# Supplementary material for: A hydrogen bonded molecular capsule versus a 3D network of tripodal organopolysilanols
Source: Royal Society of Chemistry journal article supplement (doi:10.1039/c5cc04515k), 2015-01-01
Supplement: c5cc04515k1.pdf [file c5cc04515k1.pdf]

Supporting Information  
for  
Hydrogen bonding molecular capsule versus 3D  
Network of Tripodal Organopolysilanol

Marina Fukawa, Takayuki Sato and Yoshio Kabe\*

Department of Chemistry, Faculty of Science, Kanagawa University 2946,  
Tsuchiya Hiratska 259-1293 Japan

|                                                 |     |
|-------------------------------------------------|-----|
| 1. Experimental Procedure and Spectral Data     | S2  |
| 2. Crystallographic Data                        | S7  |
| 3. <sup>1</sup> H NMR Titration and Job's plots | S10 |
| 4. ESI Mass Spectral Data                       | S36 |
| 5. Supporting References                        | S38 |

## 1. Experimental Procedures and Spectral Data

All reactions were performed under an argon atmosphere unless otherwise specified. The  $^1\text{H}$  NMR and  $^{13}\text{C}$  NMR spectra were recorded at room temperature using the JEOL JNM-ECP 500, JNM-ECS 400 and JNM-ECA 400 spectrometers. The low resolution EI mass spectra were measured on a JEOL JMS-AX505H mass spectrometer and the MALDI-TOF mass spectra were measured on a SHIMAZU AXIMA-CFR mass spectrometer using angiotensin II and Insulin  $\beta$  for accurate mass calibration. The high resolution mass spectra (ESI) were recorded on a JEOL JMS-T100LC mass spectrometer using reserpine for accurate mass calibration. Melting points were determined using a Yanaco MP-S3. HPLC (GPC) purification was performed using a Japan analytical industry LC-908. The commercially available solvents and reagents were purchased from Sigma-Aldrich, Wako, TCI and KANTO. Tetrahydrofuran (THF), Hexane and Benzene were distilled from sodium benzophenone ketyl. Methanol was distilled from magnesium methoxide, and toluene was distilled from lithium aluminum hydride (LAH). Diphenylchlorosilane and diisopropylchlorosilane were synthesized from trichlorosilane and the corresponding Grignard reagent according to the literature methods.<sup>1)</sup> 1,3,5-tris(bromomethyl)-2,4,6-triethylbenzene (**1**) was also prepared according to the reported procedure.<sup>2)</sup>

### 1-1. Synthesis of 1,3,5-tris(dimethylsilyl)methyl-2,4,6-triethylbenzene (**2a**)

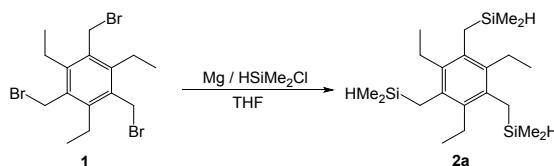

A solution of dimethylchlorosilane (2.60 mL, 23.4 mmol) in anhydrous THF (10 mL) and magnesium (0.559 g, 23.0 mmol) had added to it 1,3,5-tris(bromomethyl)-2,4,6-triethylbenzene (**1**) (3.00 g, 6.80 mmol) in anhydrous THF (40 mL) dropwise over 1 hour with cooling in an ice-salt bath. The resulting mixture was stirred for 3 hours at room temperature and then quenched with saturated  $\text{NH}_4\text{Cl}$  aqueous solution extracted with  $\text{CHCl}_3$ . After the organic layer was dried over magnesium sulfate, the solvent was evaporated. The crude product was purified by silica gel column chromatography with hexane as the eluent and recrystallized with hot methanol to yield 2.43 g of a white solid of **2a** (94.3%).

$^1\text{H}$  NMR (500 MHz,  $\text{CDCl}_3$ ):  $\delta$  0.03 (d,  $J = 3.7$  Hz, 18H,  $\text{SiCH}_3$ ), 1.13 (t,  $J = 7.5$  Hz, 9H,  $\text{Ar-CH}_2\text{-CH}_3$ ), 2.19 (d,  $J = 3.7$  Hz, 6H,  $\text{Ar-CH}_2\text{-Si}$ ), 2.52 (q,  $J = 7.5$  Hz, 6H,  $\text{Ar-CH}_2\text{-CH}_3$ ), 4.00 (m, 3H, SiH) ppm.

$^{13}\text{C}$  NMR (125 MHz,  $\text{CDCl}_3$ ):  $\delta$  -3.78 ( $\text{Si-CH}_3$ ), 13.8 ( $\text{CH}_3$ ), 17.0 ( $\text{CH}_2$ ), 24.1 ( $\text{CH}_2$ ), 133.3 (C), 134.5 (C) ppm.

$^{29}\text{Si}$  NMR (80 MHz,  $\text{CDCl}_3$ ):  $\delta$  -13.2 (SiH) ppm.

LRMS (MALDI-TOF):  $m/z$  calcd for  $\text{C}_{21}\text{H}_{42}\text{Si}_3$  [ $\text{M}^+$ ] 378, found 378.

IR (KBr):  $\tilde{\nu}$  = 2961 (s), 2927 (m), 2871 (w), 2119 (s, Si-H), 1559 (vw), 1452 (w), 1410 (w), 1251 (m), 1166 (m), 1078 (vw), 886 (s), 858 (m), 835 (m), 780 (w), 758 (w), 710 (w), 665 (w), 627 (w)  $\text{cm}^{-1}$ .

M.p. 58  $^\circ\text{C}$ .

### 1-2. Synthesis of 1,3,5-tris(diisopropylsilyl)methyl-2,4,6-triethylbenzene (**2b**)

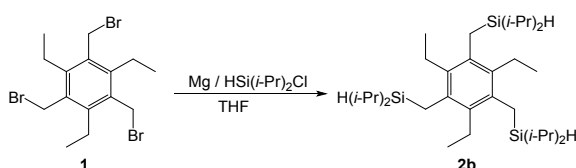

The reaction of diisopropylchlorosilane (3.65 mL, 21.4 mmol) and magnesium (0.559 g, 23.0 mmol) in anhydrous THF (10 mL) and 1,3,5-tris(bromomethyl)-2,4,6-triethylbenzene (**1**) (3.00 g, 6.80 mmol) in anhydrous THF (40 mL) was performed as described previously. The crude product was recrystallized with hot methanol to yield 1.70 g of a white solid of **2b** (45.7%).

$^1\text{H}$  NMR (500 MHz,  $\text{CDCl}_3$ ):  $\delta$  0.91 (d,  $J$  = 6.3 Hz, 18H,  $\text{SiCH}(\underline{\text{CH}_3})_2$ ), 0.92-1.00 (m, 6H,  $\text{Si}\underline{\text{C}}\text{H}(\text{CH}_3)_2$ ), 1.03 (d,  $J$  = 6.3 Hz, 18H,  $\text{SiCH}(\underline{\text{CH}_3})_2$ ), 1.39 (t,  $J$  = 7.5 Hz, 9H, Ar- $\text{CH}_2$ - $\underline{\text{C}}\text{H}_3$ ), 2.14 (d,  $J$  = 4.1 Hz, 6H, Ar- $\text{CH}_2$ -Si), 2.60 (q,  $J$  = 7.5 Hz, 6H, Ar- $\underline{\text{C}}\text{H}_2$ - $\text{CH}_3$ ), 3.58 (m, 3H, Si-H) ppm.

$^{13}\text{C}$  NMR (125 MHz,  $\text{CDCl}_3$ ):  $\delta$  10.9 ( $\text{CH}_3$ ), 12.3 (CH), 13.6 ( $\text{CH}_2$ ), 19.0 ( $\text{CH}_3$ ), 19.2 ( $\text{CH}_3$ ), 24.1 ( $\text{CH}_2$ ), 133.6 (C), 135.1 (C) ppm.

$^{29}\text{Si}$  NMR (80 MHz,  $\text{CDCl}_3$ ):  $\delta$  5.9 (SiH) ppm.

HRMS (ESI):  $m/z$  calcd for  $\text{C}_{33}\text{H}_{67}\text{Si}_3$  [ $\text{M}+\text{H}^+$ ] 547.4551, found 547.4513; calcd for  $\text{C}_{33}\text{H}_{66}\text{KSi}_3$  [ $\text{M}+\text{K}^+$ ] 585.4109, found 585.4154.

IR (KBr):  $\tilde{\nu}$  = 2938 (s), 2864 (s), 2095 (s, Si-H), 1558 (vw), 1463 (m), 1413 (w), 1380 (w), 1240 (w), 1170 (m), 1074 (w), 1004 (m), 877 (s), 795 (s), 725 (m), 691 (m), 647 (w)  $\text{cm}^{-1}$ .

M.p. 65  $^\circ\text{C}$ .

### 1-3. Synthesis of 1,3,5-tris(diphenylsilyl)methyl-2,4,6-triethylbenzene (**2c**)

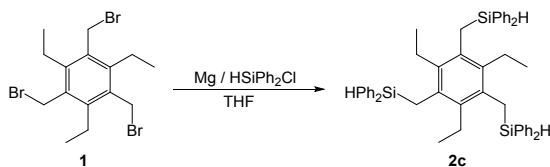

The reaction of diphenylchlorosilane (4.93 mL, 25.2 mmol) and magnesium (0.5590 g, 23.0 mmol) in anhydrous THF (10 mL) and 1,3,5-tris(bromomethyl)-2,4,6-triethylbenzene (**1**) (3.00 g, 6.80 mmol) in anhydrous THF (40 mL) was performed as described above. The crude product was recrystallized with hexane to yield 3.50 g of a white solid of **2c** (68.5%).

$^1\text{H}$  NMR (500 MHz,  $\text{CDCl}_3$ ):  $\delta$  1.02 (t,  $J = 7.4$  Hz, 9H, Ar-CH<sub>2</sub>-CH<sub>3</sub>), 2.20 (q,  $J = 7.4$  Hz, 6H, Ar-CH<sub>2</sub>-CH<sub>3</sub>), 2.58 (d,  $J = 3.6$  Hz, 6H, Ar-CH<sub>2</sub>-Si), 4.73 (t,  $J = 3.6$  Hz, 3H, SiH), 7.34 (t,  $J = 7.1$  Hz, 12H, SiPh (*m*)), 7.39 (t,  $J = 7.3$  Hz, 6H, SiPh (*p*)), 7.48 (d,  $J = 6.7$  Hz, 12H, SiPh (*o*)) ppm.

$^{13}\text{C}$  NMR (125 MHz,  $\text{CDCl}_3$ ):  $\delta$  13.4 (CH<sub>3</sub>), 16.1 (CH<sub>2</sub>), 24.1 (CH<sub>2</sub>), 128.0 (*m*-CH), 129.6 (*p*-CH), 132.5 (C), 134.4 (*ipso*-C), 135.2 (*o*-CH), 136.1 (C) ppm.

$^{29}\text{Si}$  NMR (80 MHz,  $\text{CDCl}_3$ ):  $\delta$  -16.1 (SiH) ppm.

HRMS (ESI):  $m/z$  calcd for  $\text{C}_{51}\text{H}_{54}\text{NaSi}_3$  [ $\text{M}+\text{Na}^+$ ] 789.3380, found 789.3294.

IR (KBr):  $\tilde{\nu} = 3067$  (w), 3047 (w), 2967 (m), 2925 (m), 2871 (w), 2128 (m, Si-H), 1559 (vw), 1484 (w), 1427 (m), 1162 (m), 1113 (m), 872 (s), 800 (s), 725 (m), 701 (s), 610 (vw), 541 (vw), 474 (m), 430 (w)  $\text{cm}^{-1}$ .

M.p. 119 °C.

#### 1-4. Synthesis of 1,3,5-tris(dimethylhydroxysilyl)methyl-2,4,6-triethylbenzene (**3a**)

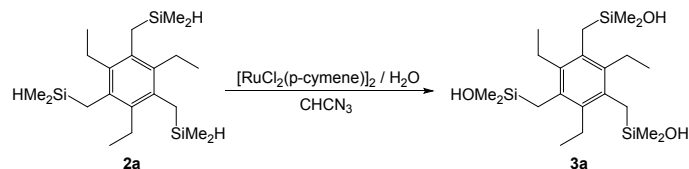

According to the reported procedure,<sup>3)</sup> the mixture of 1,3,5-tris(dimethylsilyl)methyl-2,4,6-triethylbenzene (**2a**) (300 mg, 0.792 mmol),  $\text{RuCl}_2(\text{p-cymene})]_2$  (15.0 mg, 24.5  $\mu\text{mol}$ ) and  $\text{H}_2\text{O}$  (0.214 mL, 11.9 mmol) in acetonitrile (5 mL) was stirred for 2 hours at 80 °C. The reaction mixture was purified by silica gel flush column chromatography with ethyl acetate:hexane (1:4) to yield 293 mg of a white solid of **3a** (86.6%).

$^1\text{H}$  NMR (500 MHz,  $\text{CDCl}_3$ ):  $\delta$  0.13 (s, 18H, SiMe), 1.09 (t,  $J = 7.4$  Hz, 9H, Ar-CH<sub>2</sub>-CH<sub>3</sub>), 1.98 (br, 3H, SiOH), 2.26 (s, 6H, Ar-CH<sub>2</sub>-Si), 2.58 (q,  $J = 7.4$  Hz, 6H, Ar-CH<sub>2</sub>-CH<sub>3</sub>), 4.41 (SiOH, Acetone-*d*<sub>6</sub>) ppm.

$^{13}\text{C}$  NMR (125 MHz,  $\text{CDCl}_3$ ):  $\delta$  0.99 (Si-CH<sub>3</sub>), 13.7 (CH<sub>3</sub>), 21.1 (CH<sub>2</sub>), 24.2 (CH<sub>2</sub>), 132.7 (C), 135.0 (C) ppm.

$^{29}\text{Si}$  NMR (80 MHz, Acetone-*d*<sub>6</sub>):  $\delta$  12.2 (SiOH) ppm.

HRMS (ESI):  $m/z$  calcd for  $\text{C}_{21}\text{H}_{42}\text{NaO}_3\text{Si}_3$  [ $\text{M}+\text{Na}^+$ ] 449.2339, found 449.2338.

IR (KBr):  $\tilde{\nu} = 3171$  (brs, SiO-H), 2964 (s), 2927 (s), 2873 (m), 1560 (w), 1412 (m), 1254 (s), 1161

(m), 1117 (m), 1078 (m), 875 (s), 770 (m), 730 (w), 642 (w)  $\text{cm}^{-1}$ .

M.p. 186 °C.

#### 1-5. Synthesis of 1,3,5-tris(diisopropylhydroxysilyl)methyl-2,4,6-triethylbenzene (**3b**)

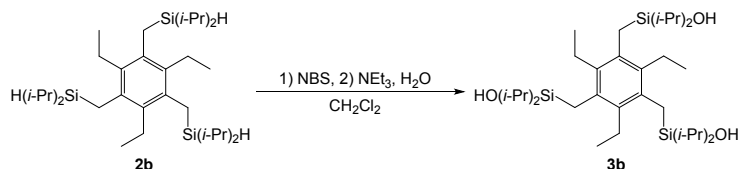

The mixture of 1,3,5-tris(diisopropylsilyl)methyl-2,4,6-triethylbenzene (**2b**) (220 mg, 0.403 mmol), N-bromosuccinimide (NBS) (237 mg, 1.33 mmol) in CH<sub>2</sub>Cl<sub>2</sub> (10 mL) was stirred for 2 hours at room temperature. Then triethylamine (0.300 mL, 2.15 mmol) and H<sub>2</sub>O (32.6  $\mu\text{L}$ , 1.81 mmol) were added and stirred for 2 additional hours. The solvent remained in vacuo. The resulting mixture was extracted with hexane (15 mL) and filtered. The filtrate was evaporated to yield a yellow solid. The crude product was recrystallized with benzene to yield 235 mg of a white solid of **3b** (98.0%).

<sup>1</sup>H NMR (500 MHz, CDCl<sub>3</sub>):  $\delta$  0.94 (d,  $J = 5.6$  Hz, 18H, SiCH(CH<sub>3</sub>)<sub>2</sub>), 0.97-1.01 (m, 6H, SiCH(CH<sub>3</sub>)<sub>2</sub>), 1.04 (d,  $J = 6.3$  Hz, 18H, Si(CH(CH<sub>3</sub>)<sub>2</sub>)), 1.10 (t,  $J = 7.4$  Hz, 9H, Ar-CH<sub>2</sub>-CH<sub>3</sub>), 1.66 (br, SiOH), 2.21 (s, 6H, Ph-CH<sub>2</sub>-Si), 2.65 (q,  $J = 7.4$  Hz, 6H, Ph-CH<sub>2</sub>-CH<sub>3</sub>), 4.13 (SiOH, Acetone-*d*<sub>6</sub>) ppm.

<sup>13</sup>C NMR (125 MHz, CDCl<sub>3</sub>):  $\delta$  13.5 (CH<sub>3</sub>), 13.6 (CH), 15.4 (CH<sub>2</sub>), 17.4 (CH<sub>3</sub>)<sub>2</sub>, 24.2 (CH<sub>2</sub>), 132.9 (C), 135.6 (C) ppm.

<sup>29</sup>Si NMR (80 MHz, CDCl<sub>3</sub>):  $\delta$  13.1 (SiOH) ppm.

HRMS (ESI):  $m/z$  calcd for C<sub>33</sub>H<sub>67</sub>O<sub>3</sub>Si<sub>3</sub> [M+H<sup>+</sup>] 595.4398, found 595.4430; calcd for C<sub>33</sub>H<sub>66</sub>NaO<sub>3</sub>Si<sub>3</sub> [M+Na<sup>+</sup>] 617.4217, found 617.4193; calcd for C<sub>33</sub>H<sub>66</sub>KO<sub>3</sub>Si<sub>3</sub> [M+K<sup>+</sup>] 633.3957, found 633.3938.

IR (KBr):  $\tilde{\nu} = 3453$  (brm, SiO-H), 2943 (s), 2867 (m), 1558 (vw), 1464 (m), 1411 (w), 1377 (vw), 1243 (w), 1151 (m), 1068 (w), 990 (w), 880 (m), 847 (m), 810 (s), 727 (m), 662 (m), 456 (w)  $\text{cm}^{-1}$ .

M.p. 130 °C.

#### 1-6. Synthesis of 1,3,5-tris(diphenylhydroxysilyl)methyl-2,4,6-triethylbenzene (**3c**)

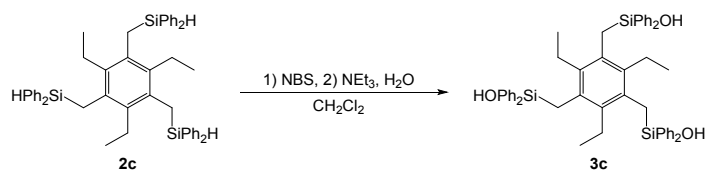

The reaction of 1,3,5-tris(diphenylsilyl)methyl-2,4,6-triethylbenzene (**2c**) (303 mg, 0.403 mmol) and

N-bromosuccinimide (NBS) (237 mg, 1.33 mmol) in CH<sub>2</sub>Cl<sub>2</sub> (8 mL) was performed as described previously. The solvent was removed in vacuo. The resulting mixture was extended with ethyl acetate, then washed with water three times. The organic layer was dried with anhydrous magnesium sulfate, and then the solvent was evaporated. The resulting oily solid was extracted with diethylether and the solvent was removed in vacuo to yield 278 mg of a yellow solid of **3c** (86.4%).

<sup>1</sup>H NMR (500 MHz, CDCl<sub>3</sub>): δ 0.95 (t, *J* = 7.4 Hz, 9H, Ar-CH<sub>2</sub>-CH<sub>3</sub>), 2.20 (q, *J* = 7.4 Hz, 6H, Ar-CH<sub>2</sub>-CH<sub>3</sub>), 2.66 (s, 6H, Ar-CH<sub>2</sub>-Si), 3.26 (br, SiOH), 7.30 (t, *J* = 7.3 Hz, 12H, SiPh (*m*)), 7.37 (t, *J* = 7.3 Hz, 6H, SiPh (*p*)), 7.51 (d, *J* = 6.7 Hz, 12H, SiPh (*o*)), 4.67 (SiOH, Acetone-*d*<sub>6</sub>) ppm.

<sup>13</sup>C NMR (125 MHz, CDCl<sub>3</sub>): δ 13.3 (CH<sub>3</sub>), 18.9 (CH<sub>2</sub>), 24.3 (CH<sub>2</sub>), 127.9 (*m*-CH), 129.8 (*p*-CH), 132.1 (C), 134.0 (*o*-CH), 136.6 (C), 137.0 (*ipso*-C) ppm.

<sup>29</sup>Si NMR (80 MHz, CDCl<sub>3</sub>): δ -10.8 (SiOH) ppm.

HRMS (ESI): *m/z* calcd for C<sub>51</sub>H<sub>54</sub>NaO<sub>3</sub>Si<sub>3</sub> [*M*+Na<sup>+</sup>] 821.3278, found 821.3294.

IR (KBr):  $\tilde{\nu}$  = 3401 (brm, SiO-H), 3068 (m), 3048 (m), 2960 (m), 2925 (m), 2870 (w), 1589 (w), 1485 (w), 1426 (m), 1167 (m), 1114 (s), 1075 (m), 853 (s), 729 (s), 699 (s), 630 (m), 557 (m), 479 (m), 450 (w) cm<sup>-1</sup>.

M.p. 104 °C.

## 2. Crystallographic Data

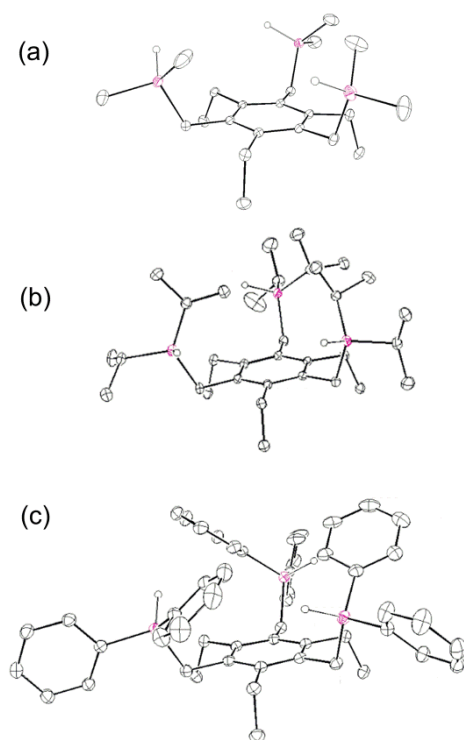

Figure S1 X-ray molecular structures of (a) **2a**, (b) **2b** and (c) **2c·0.5 hexane**. The thermal ellipsoids were scaled to 30% probability. One of the two independent molecules in (b) and a solvent molecule in (c) were omitted for clarity.

Table S1. Crystal data and data collection parameters of **2a**, **2b** and **2c·0.5hexane**

|                                           | <b>2a</b>                                       | <b>2b</b>                                       | <b>2c·0.5hexane</b>                             |
|-------------------------------------------|-------------------------------------------------|-------------------------------------------------|-------------------------------------------------|
| Empirical formula                         | C <sub>21</sub> H <sub>42</sub> Si <sub>3</sub> | C <sub>33</sub> H <sub>66</sub> Si <sub>3</sub> | C <sub>54</sub> H <sub>61</sub> Si <sub>3</sub> |
| Formula weight                            | 378.82                                          | 547.13                                          | 794.3                                           |
| Temperature (K)                           | 120 (2)                                         | 120 (2)                                         | 120 (2)                                         |
| Wavelength (Å)                            | 0.7103                                          | 0.7103                                          | 0.7103                                          |
| Crystal system                            | Monoclinic                                      | Monoclinic                                      | Triclinic                                       |
| Space group                               | P21/n                                           | P21/c                                           | P-1                                             |
| a (Å)                                     | 8.5296 (13)                                     | 27.388 (3)                                      | 13.138 (3)                                      |
| b (Å)                                     | 22.691 (3)                                      | 9.4848 (9)                                      | 14.093 (3)                                      |
| c (Å)                                     | 13.414 (2)                                      | 27.972 (3)                                      | 14.255 (3)                                      |
| α (deg)                                   | 90.00                                           | 90.00                                           | 70.500 (8)                                      |
| β (deg)                                   | 105.992 (2)                                     | 93.236 (2)                                      | 84.236 (10)                                     |
| γ (deg)                                   | 90.00                                           | 90.00                                           | 70.660 (8)                                      |
| Volume (Å <sup>3</sup> )                  | 2495.7 (7)                                      | 7254.9 (13)                                     | 2347.5 (8)                                      |
| Z                                         | 4                                               | 4                                               | 2                                               |
| Density (calculated) (g/cm <sup>3</sup> ) | 1.008                                           | 1.002                                           | 1.124                                           |

|                                                |                                                               |                                                               |                                                               |
|------------------------------------------------|---------------------------------------------------------------|---------------------------------------------------------------|---------------------------------------------------------------|
| Absorption coefficient (mm <sup>-1</sup> )     | 0.192                                                         | 0.149                                                         | 0.135                                                         |
| F (000)                                        | 840                                                           | 2448                                                          | 854                                                           |
| Crystal size (mm)                              | 0.36 × 0.25 × 0.12                                            | 0.20 × 0.15 × 0.10                                            | 0.30 × 0.30 × 0.16                                            |
| Crystal color and habit                        | Colorless, Prism                                              | Colorless, Platelet                                           | Colorless, Block                                              |
| Solvent system                                 | MeOH                                                          | MeOH                                                          | Hexane                                                        |
| Diffractometer                                 | Rigaku Mercury CCD                                            | Rigaku Mercury CCD                                            | Rigaku Mercury CCD                                            |
| Theta range for Data collection (deg)          | 3.12 to 27.48                                                 | 3.03 to 27.48                                                 | 3.10 to 27.45                                                 |
| Indexes                                        | -11 ≤ h ≤ 10<br>-29 ≤ k ≤ 26<br>-17 ≤ l ≤ 17                  | -35 ≤ h ≤ 32<br>-11 ≤ k ≤ 11<br>-36 ≤ l ≤ 36                  | -17 ≤ h ≤ 17<br>-18 ≤ k ≤ 18<br>-18 ≤ l ≤ 18                  |
| Reflections collected                          | 19840                                                         | 57106                                                         | 37424                                                         |
| Independent reflections (Rint)                 | 5674 (0.1054)                                                 | 16329 (0.0480)                                                | 10655 (0.0859)                                                |
| Completeness to theta (%)                      | 99.2 %                                                        | 98.1 %                                                        | 99.3 %                                                        |
| Absorption correction                          | None                                                          | None                                                          | None                                                          |
| Solution method                                | SHELXS-97<br>(Sheldrick, 2008)                                | SHELXS-97<br>(Sheldrick, 2008)                                | SHELXS-97<br>(Sheldrick, 2008)                                |
| Refinement method                              | Full-matrix<br>least-squares on F <sup>2</sup><br>(SHELXS-97) | Full-matrix<br>least-squares on F <sup>2</sup><br>(SHELXS-97) | Full-matrix<br>least-squares on F <sup>2</sup><br>(SHELXS-97) |
| Data / restraints / parameters                 | 5674 / 0 / 238                                                | 16329 / 1 / 703                                               | 10655 / 0 / 530                                               |
| Goodness of Fit Indicator                      | 1.063                                                         | 1.072                                                         | 1.079                                                         |
| Final R indices [I > 2σ(I)]                    | R1 = 0.0523, wR2 =<br>0.1258                                  | R1 = 0.0604, wR2 =<br>0.1535                                  | R1 = 0.0605, wR2 =<br>0.1359                                  |
| R indices (all data)                           | R1 = 0.0601, wR2 =<br>0.1325                                  | R1 = 0.0780, wR2 =<br>0.1677                                  | R1 = 0.0716, wR2 =<br>0.1435                                  |
| Largest diff peak and hole (eÅ <sup>-3</sup> ) | 0.757 and -0.449                                              | 1.282 and -0.635                                              | 0.411 and -0.276                                              |

Table S2. Crystal data and data collection parameters of **3a**, **3b** and **3c·H<sub>2</sub>O**

|                   | <b>3a</b>                                                      | <b>3b</b>                                                      | <b>3c·H<sub>2</sub>O</b>                                       |
|-------------------|----------------------------------------------------------------|----------------------------------------------------------------|----------------------------------------------------------------|
| Empirical formula | C <sub>21</sub> H <sub>42</sub> O <sub>3</sub> Si <sub>3</sub> | C <sub>33</sub> H <sub>66</sub> O <sub>3</sub> Si <sub>3</sub> | C <sub>51</sub> H <sub>56</sub> O <sub>4</sub> Si <sub>3</sub> |
| Formula weight    | 426.82                                                         | 595.13                                                         | 817.23                                                         |
| Temperature (K)   | 120 (2)                                                        | 120 (2)                                                        | 120 (2)                                                        |
| Wavelength (Å)    | 0.71073                                                        | 0.71073                                                        | 0.71073                                                        |
| Crystal system    | Cubic                                                          | Monoclinic                                                     | Orthorhombic                                                   |
| Space group       | P213                                                           | P21/c                                                          | Pcan                                                           |



|                                                |                                                               |                                                               |                                                               |
|------------------------------------------------|---------------------------------------------------------------|---------------------------------------------------------------|---------------------------------------------------------------|
| a (Å)                                          | 17.538 (3)                                                    | 17.093 (4)                                                    | 19.2489 (17)                                                  |
| b (Å)                                          | 17.538 (3)                                                    | 12.364 (3)                                                    | 19.7912 (18)                                                  |
| c (Å)                                          | 17.538 (3)                                                    | 19.610 (5)                                                    | 23.545 (2)                                                    |
| $\alpha$ (deg)                                 | 90.00                                                         | 90.00                                                         | 90.00                                                         |
| $\beta$ (deg)                                  | 90.00                                                         | 112.776 (3)                                                   | 90.00                                                         |
| $\gamma$ (deg)                                 | 90.00                                                         | 90.00                                                         | 90.00                                                         |
| Volume (Å <sup>3</sup> )                       | 5394.4 (13)                                                   | V = 3821.4 (16)                                               | 8969.5 (14)                                                   |
| Z                                              | 8                                                             | 4                                                             | 8                                                             |
| Density (calculated) (g/cm <sup>3</sup> )      | 1.051                                                         | 1.034                                                         | 1.210                                                         |
| Absorption coefficient (mm <sup>-1</sup> )     | 0.192                                                         | 0.152                                                         | 0.150                                                         |
| F (000)                                        | 1872                                                          | 1320                                                          | 3488                                                          |
| Crystal size (mm)                              | 0.27 × 0.27 × 0.25                                            | 0.36 × 0.33 × 0.30                                            | 0.34 × 0.23 × 0.18                                            |
| Crystal color and habit                        | Colorless, Prism                                              | Colorless, Block                                              | Colorless, Prism                                              |
| Solvent system                                 | Et <sub>2</sub> O / Toluene                                   | Benzene                                                       | Et <sub>2</sub> O / Hexane                                    |
| Diffractometer                                 | Rigaku Mercury CCD                                            | Rigaku Mercury CCD                                            | Rigaku Mercury CCD                                            |
| Theta range for Data collection (deg)          | 3.49 to 27.46                                                 | 3.00 to 27.47                                                 | 3.08 to 27.49                                                 |
| Indexes                                        | -22 ≤ h ≤ 21                                                  | -17 ≤ h ≤ 22                                                  | -24 ≤ h ≤ 24                                                  |
|                                                | -22 ≤ k ≤ 21                                                  | -16 ≤ k ≤ 16                                                  | -25 ≤ k ≤ 20                                                  |
|                                                | -22 ≤ l ≤ 22                                                  | -25 ≤ l ≤ 23                                                  | -30 ≤ l ≤ 20                                                  |
| Reflections collected                          | 43825                                                         | 29167                                                         | 70063                                                         |
| Independent reflections (Rint)                 | 4127 (0.0758)                                                 | 8565 (0.1250)                                                 | 10228 (0.0830)                                                |
| Completeness to theta (%)                      | 99.5 %                                                        | 98.1                                                          | 99.5 %                                                        |
| Absorption correction                          | None                                                          | None                                                          | None                                                          |
| Solution method                                | SHELXS-97<br>(Sheldrick, 2008)                                | SHELXS-97<br>(Sheldrick, 2008)                                | SHELXS-97<br>(Sheldrick, 2008)                                |
| Refinement method                              | Full-matrix<br>least-squares on F <sup>2</sup><br>(SHELXS-97) | Full-matrix<br>least-squares on F <sup>2</sup><br>(SHELXS-97) | Full-matrix<br>least-squares on F <sup>2</sup><br>(SHELXS-97) |
| Data / restraints / parameters                 | 4127 / 0 / 169                                                | 8565 / 0 / 367                                                | 10228 / 12 / 534                                              |
| Goodness of Fit Indicator                      | 1.124                                                         | 1.048                                                         | 1.120                                                         |
| Final R indices [I > 2σ(I)]                    | R <sub>1</sub> = 0.0513,<br>wR <sub>2</sub> = 0.1203          | R <sub>1</sub> = 0.0549,<br>wR <sub>2</sub> = 0.1482          | R <sub>1</sub> = 0.0547,<br>wR <sub>2</sub> = 0.1235          |
| R indices (all data)                           | R <sub>1</sub> = 0.0534,<br>wR <sub>2</sub> = 0.1219          | R <sub>1</sub> = 0.0625,<br>wR <sub>2</sub> = 0.1568          | R <sub>1</sub> = 0.0649,<br>wR <sub>2</sub> = 0.1290          |
| Largest diff peak and hole (eÅ <sup>-3</sup> ) | 0.300 and -0.285                                              | 0.647 and -0.394                                              | 0.326 d -0.370                                                |

### 3. $^1\text{H}$ NMR titrations and Job's plots

#### 3-1. $^1\text{H}$ NMR dilution experiments

The NMR experiments are only suitable for determining equilibrium constants in relatively simple systems. If there are more than two or three equilibrium constants, it is unlikely that the NMR experiments will give reliable association constants. In such circumstances, the uncertainties will be unacceptably large.

For incompletely condensed polyhedral silsesquioxane (POSS)-triol there existed a dynamic equilibrium between the single molecules and hydrogen-bonded dimers.

With decreasing concentrations of POSS-triol, the POSS-triol dimer gradually dissociated to form a single POSS-triol, which represented the SiOH single shift to the upfield.<sup>4)</sup>

The  $^1\text{H}$  NMR dilution experiments for **3a**, **3b** and **3c** were investigated at three different concentrations, ca 5 mM, 2.5 mM and 1.25 mM for each compound. Stock solutions of **3a**, **3b** and **3c** were prepared as follows. ca 1.2 mmol of **3a**, **3b** and **3c** were placed in 2 mL volumetric flasks, which were then dissolved in Acetone- $d_6$ . By adding one drop of tetramethylsilane (TMS) as the internal standard, these solutions were brought up to 2 mL total volume.

From the stock solutions, ca 400  $\mu\text{L}$  of each solution of **3a**, **3b** and **3c** was placed into 5 mL volumetric flasks using a microsyringe. The resulting solutions were diluted with Acetone- $d_6$  up to 5 mL, resulting in ca 5 mM solutions. Using a microsyringe, two-fold dilutions of the stock solution was placed in a NMR tube yielding ca 2.5 mM solution, while four-fold dilutions yielded ca 1.25 mM solution.

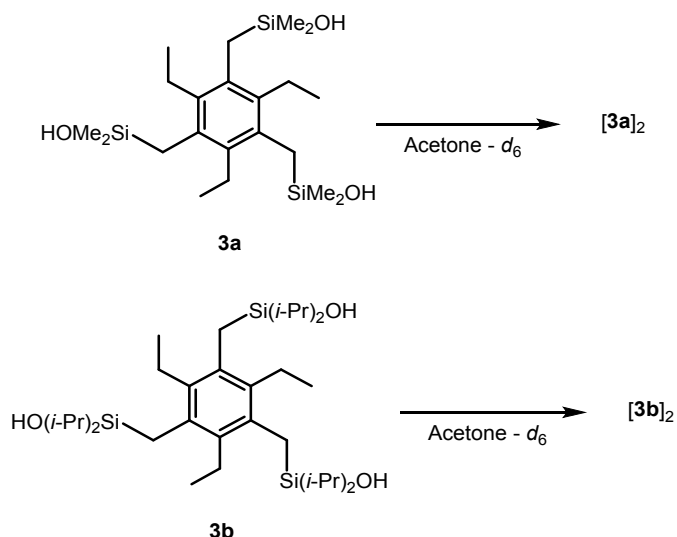

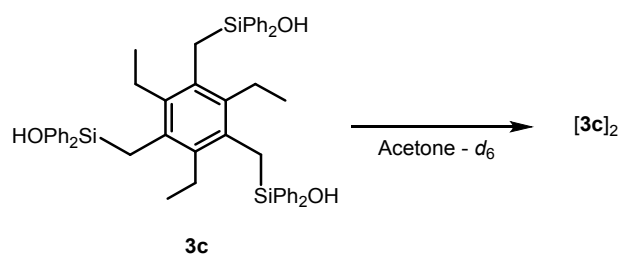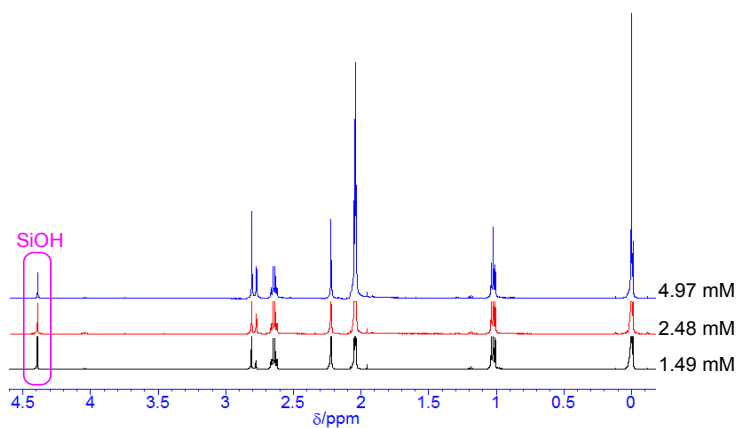

Figure S2  $^1\text{H}$  NMR spectrum of **3a** (500 MHz, Acetone- $d_6$ ).  
 Top; 4.97 mM, middle; 2.48 mM, bottom; 1.49 mM

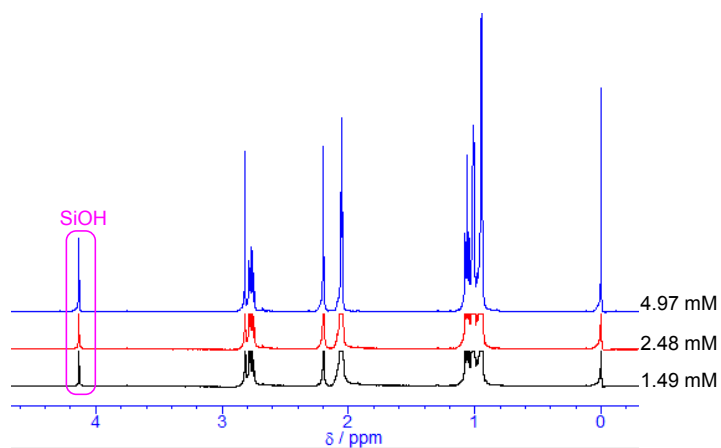

Figure S3  $^1\text{H}$  NMR spectrum of **3b** (500 MHz, Acetone- $d_6$ ).  
 Top; 4.97 mM, middle; 2.48 mM, bottom; 1.49 mM

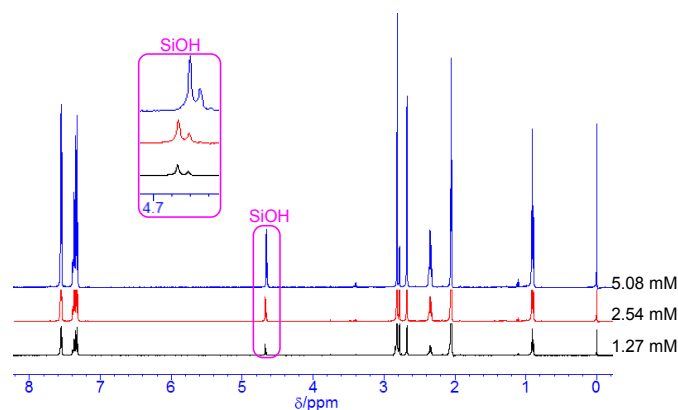

Figure S4  $^1\text{H}$  NMR spectrum of **3c** (500 MHz, Acetone- $d_6$ ).

Top; 5.08 mM, middle; 2.54 mM, bottom; 1.27 mM

The dilutions of **3a**, **3b** and **3c** caused virtually no shift ( $\Delta\delta \leq 0.002$  ppm for **3a**, 0.0018 ppm for **3b**, and 0.010 ppm for **3c**) indicating that intermolecular dimerization is negligible, at least in our experimental condition range in Acetone- $d_6$  (see Figure S2, S3, and S4). Therefore, NMR titrations and Job's plots were carried out in less than 5 mM solution of **3a**, **3b** and **3c** as follows.

### 3-2. $^1\text{H}$ NMR titrations and Job's plots

5 mM stock solutions of **3a-c** ( $[H]$ ) and anion ( $[G]$ ) were prepared separately after a two-fold dilution. For the  $^1\text{H}$  NMR titrations, 5 mM stock solutions of **3a**, **3b** and **3c** and 100-400 mM stock solutions of a one-fold dilution were used. For Job's plots<sup>5)</sup> both the 5 mM stock solutions were used. When successive studies of  $^1\text{H}$  NMR titrations and Job's plots were not performed at once, a different stock solution was prepared for each experiment.

The  $^1\text{H}$ -NMR titrations were carried out by adding aliquots of the anion as their n-butylammonium salts to a NMR tube using a microsyringe. After each addition, spectra were recorded and SiOH resonance was monitored for calculating the association constants by the WinEQNMR<sup>6)</sup>. Anion from 7.0 to 66.5 equivalents were added.

In order to determine the association stoichiometry, the NMR samples were prepared with different proportions of **3a**, **3b** and **3c** and anion solution so that the total concentration ( $[H] + [G]$ ) for each sample was 5 mM. TMS was used as an external reference. Each NMR sample was run at room temperature. The resonance of SiOH was shifted downfield as the mole fraction of the anion was decreased. The Job's plots<sup>5)</sup> plotting  $\Delta\delta [H]/([H] + [G])$  with mole fraction  $[H]/([H] + [G])$ , indicated an 1 : 1 stoichiometry.

### For the titrations and Job's plot of **3a** and the chloride anion

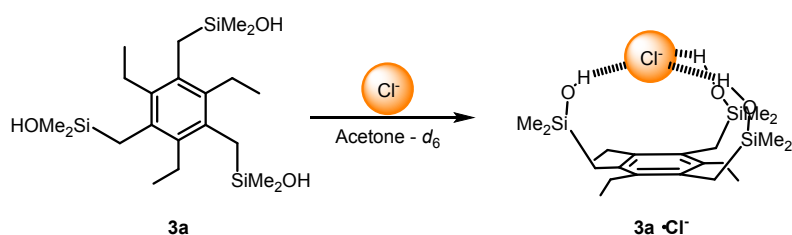

**3a** (47.7 mg, 0.112 mmol) was placed in a 2 mL volumetric flask, and was then dissolved in Acetone- $d_6$ . By adding one drop of TMS as the internal standard, the solution came to 2 mL total volume. From the stock solution, 450  $\mu\text{L}$  of solution **3a** was placed in a 5 mL volumetric flask using a microsyringe. The resulting solution was diluted with Acetone- $d_6$  up to 5 mL, yielding a 5.03 mM host solution.

Tetrabutylammoniumchloride (TBACl) (166 mg, 0.598 mmol) was placed in a 2 mL volumetric flask, and was then dissolved in Acetone- $d_6$  up to 2 mL total volume, yielding a 299 mM guest solution.

After 500  $\mu\text{L}$  of the host solution (5.03 mM) was added to a NMR tube, the  $^1\text{H}$  NMR spectra was recorded. The host solution was titrated by adding incremental amounts of the 299 mM guest solution shown in Table S3. The gradual downshift of the SiOH resonance was monitored as shown in Figure S5. The association constant  $K_a = 35.2 \text{ M}^{-1}$  was obtained by titration curve fitting using the WinEQNMR program shown in Figure S6.

As shown in Table S4, the NMR samples with different proportions of **3a** ( $[H]$ ) and chloride anions ( $[G]$ ) were prepared for the total concentration of ( $[H]+[G]$ ) to be 5 mM. The  $^1\text{H}$  NMR spectra were recorded and the change in  $^1\text{H}$  NMR SiOH resonances with the mole fraction of  $[G]$  is listed in Table S4. The Job's plot is shown in Figure S7. The maximum appears at a mole fraction of 0.5 indicating an 1 : 1 stoichiometry.

Table S3 Added amounts of TBACl to **3a** and chemical shift changes of SiOH resonance

| TOTAL Guest ( $\mu\text{L}$ ) | eq   | $\delta$ (ppm) | $\Delta\delta$ (ppm) |
|-------------------------------|------|----------------|----------------------|
| 0                             | 0    | 4.4058         | 0.0000               |
| 10                            | 1.19 | 4.8281         | 0.4223               |
| 20                            | 2.38 | 5.0489         | 0.6431               |
| 30                            | 3.57 | 5.1836         | 0.7778               |
| 50                            | 5.94 | 5.3751         | 0.9693               |
| 80                            | 9.51 | 5.5528         | 1.1470               |
| 100                           | 11.9 | 5.6362         | 1.2304               |
| 120                           | 14.3 | 5.7030         | 1.2972               |
| 160                           | 19.0 | 5.8047         | 1.3989               |

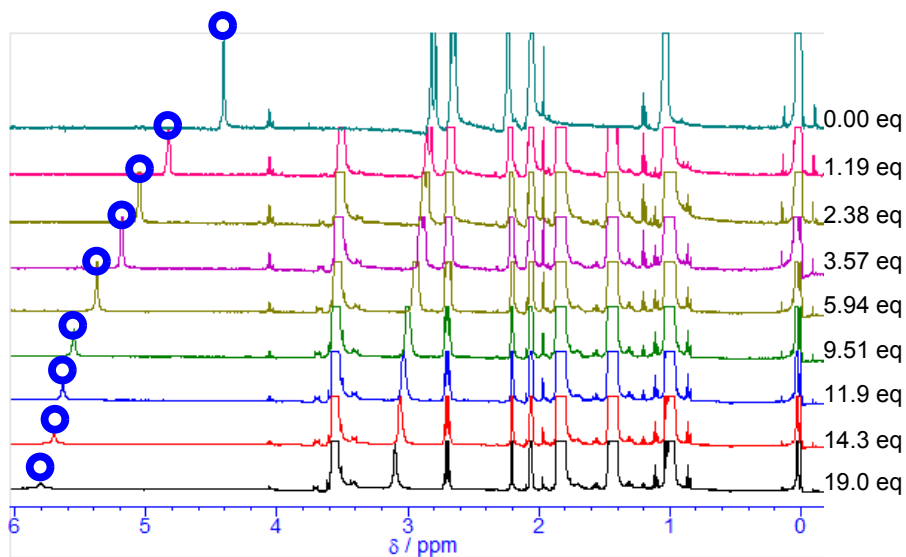

Figure S5  $^1\text{H}$  NMR titration spectra of **3a** with TBACl.

The SiOH chemical shifts are marked with circles.

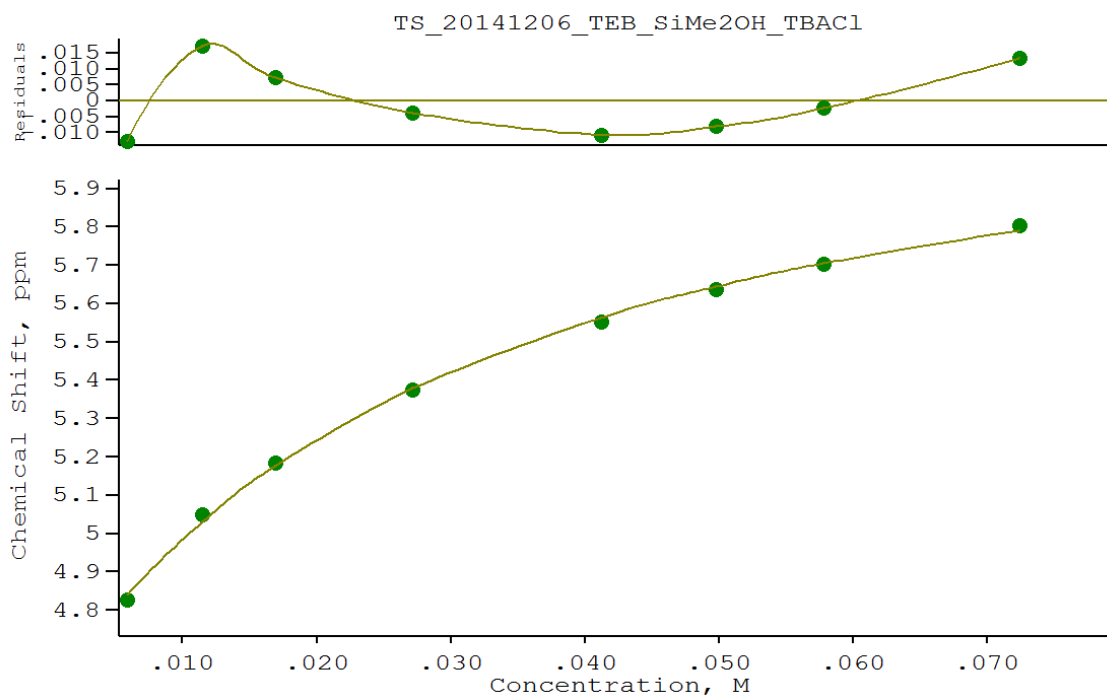

Figure S6 Determination of  $K_a$  using SiOH resonance by WinEQNMR for **3a** and TBACl. The concentration of TBACl is given on the X-axis.

#### Calculation for the titration of **3a** with TBACl.

Calculations by WinEQNMR2 Version 2.00 by Michael J. Hynes

Program run at 16:40:58 on 03/19/2015

TS\_20141206\_TEB\_SiMe2OH\_TBACl

Equilibrium constants are floating point numbers

| NO. | A | PARAMETER   | DELTA     | ERROR     | CONDITION | DESCRIPTION |
|-----|---|-------------|-----------|-----------|-----------|-------------|
| 1   | 1 | 3.51744E+01 | 1.000E+00 | 3.747E+00 | 6.366E+01 | K11         |
| 2   | 1 | 4.58115E+00 | 4.410E-02 | 2.722E-02 | 1.029E+01 | SHIFT_H     |
| 3   | 1 | 6.28407E+00 | 5.800E-02 | 5.335E-02 | 3.332E+01 | SHIFT_HG    |

ORMS ERROR = 1.34E-02 MAX ERROR = 1.73E-02 AT OBS.NO. 2

RESIDUALS SQUARED = 8.96E-04

RFACTOR = 0.1959 PERCENT

| NO.        | A | EXPT. DEL  | CALC. DEL  | RESIDUAL    | % DEV       | WEIGHT     | CI-        |
|------------|---|------------|------------|-------------|-------------|------------|------------|
| receptor   |   | pH         |            |             |             |            |            |
| 1          | 1 | 4.8281E+00 | 4.8409E+00 | -1.2835E-02 | -2.6583E-01 | 1.0000E+00 | 5.8600E-03 |
| 4.9300E-03 |   | 0.0000E+00 |            |             |             |            |            |
| 2          | 1 | 5.0489E+00 | 5.0316E+00 | 1.7269E-02  | 3.4204E-01  | 1.0000E+00 | 1.1490E-02 |
| 4.8400E-03 |   | 0.0000E+00 |            |             |             |            |            |
| 3          | 1 | 5.1836E+00 | 5.1763E+00 | 7.3233E-03  | 1.4128E-01  | 1.0000E+00 | 1.6910E-02 |
| 4.7400E-03 |   | 0.0000E+00 |            |             |             |            |            |
| 4          | 1 | 5.3751E+00 | 5.3789E+00 | -3.8362E-03 | -7.1369E-02 | 1.0000E+00 | 2.7170E-02 |
| 4.5700E-03 |   | 0.0000E+00 |            |             |             |            |            |
| 5          | 1 | 5.5528E+00 | 5.5635E+00 | -1.0730E-02 | -1.9323E-01 | 1.0000E+00 | 4.1220E-02 |
| 4.3400E-03 |   | 0.0000E+00 |            |             |             |            |            |
| 6          | 1 | 5.6362E+00 | 5.6443E+00 | -8.1449E-03 | -1.4451E-01 | 1.0000E+00 | 4.9800E-02 |
| 4.1900E-03 |   | 0.0000E+00 |            |             |             |            |            |
| 7          | 1 | 5.7030E+00 | 5.7054E+00 | -2.3613E-03 | -4.1404E-02 | 1.0000E+00 | 5.7840E-02 |
| 4.0600E-03 |   | 0.0000E+00 |            |             |             |            |            |
| 8          | 1 | 5.8047E+00 | 5.7914E+00 | 1.3316E-02  | 2.2939E-01  | 1.0000E+00 | 7.2440E-02 |
| 3.8100E-03 |   | 0.0000E+00 |            |             |             |            |            |

TOLERANCE ON SUM OF SQUARES 0.0100

TOLERANCE ON EIGEN VALUES 0.0001

CONVERGANCE AFTER 10 ITERATIONS

Table S4 Data for Job's plot of **3a** with TBACl

| Host ( $\mu\text{L}$ ) | Guest ( $\mu\text{L}$ ) | $[\text{H}]/([\text{H}]+[\text{G}])$ | $\delta$ (ppm) | $\Delta\delta$ $[\text{H}]/([\text{H}]+[\text{G}])$ |
|------------------------|-------------------------|--------------------------------------|----------------|-----------------------------------------------------|
| 50                     | 450                     | 0.1                                  | 4.8565         | 0.0454                                              |
| 100                    | 400                     | 0.2                                  | 4.8135         | 0.0822                                              |
| 150                    | 350                     | 0.3                                  | 4.7695         | 0.1101                                              |
| 200                    | 300                     | 0.4                                  | 4.7191         | 0.1266                                              |
| 250                    | 250                     | 0.5                                  | 4.6715         | 0.1344                                              |
| 300                    | 200                     | 0.6                                  | 4.6129         | 0.1260                                              |
| 350                    | 150                     | 0.7                                  | 4.5633         | 0.1123                                              |
| 450                    | 50                      | 0.9                                  | 4.4607         | 0.0519                                              |
| 500                    | 0                       | 1                                    | 4.4030         | 0.0000                                              |

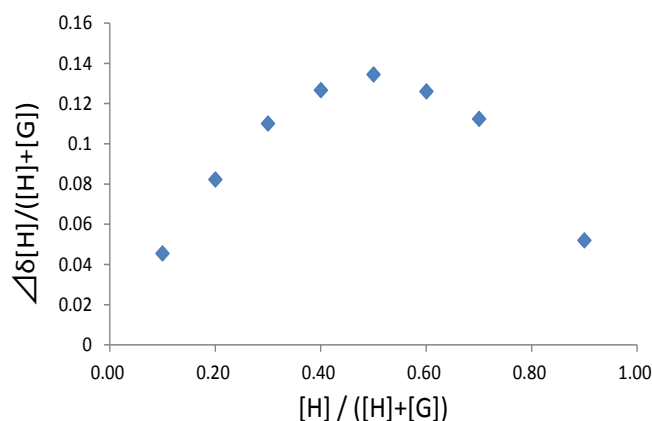Figure S7 Job's plot of **3a** with TBACl

#### For the titrations and Job's plot of **3a** and the bromide anion

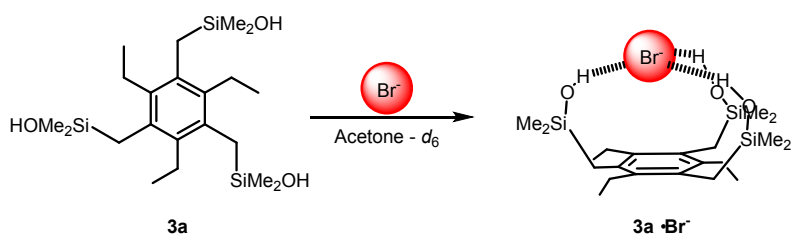

**3a** (58.1 mg, 0.136 mmol) was placed in a 2 mL volumetric flask, and was then dissolved in Acetone- $d_6$ . By adding a drop of TMS as the internal standard, the solution came to 2 mL total volume.

From the stock solution, 370  $\mu\text{L}$  of solution **3a** was placed in a 5 mL volumetric flask using a microsyringe. The resulting host solution was diluted with Acetone- $d_6$  up to 5 mL, yielding a 5.00 mM host solution.

Tetrabutylammonium Bromide (TBABr) (300 mg, 0.930 mmol) was placed in a 2 mL volumetric flask, and was then dissolved in Acetone- $d_6$  up to 2 mL, yielding a 465 mM guest solution.

From the resulting guest solution, 54.0  $\mu\text{L}$  was placed in a 5 mL volumetric flask using a microsyringe, and was then dissolved in Acetone- $d_6$  up to 5 mL, yielding 5.00 mM of guest solution.



After 500  $\mu\text{L}$  of the host solution (5.00 mM) was added to a NMR tube, the  $^1\text{H}$  NMR spectra were recorded. The host solution was titrated by adding an incremental amount of the 465 mM guest solution as shown in Table S5. The gradual downshift of the SiOH resonance was monitored as shown in Figure S8. The association constant  $K_a = 6.94$  was obtained by titration curve fitting using the WinEQNMR program shown in Figure S9.

As shown in Table S6, the NMR samples with different proportions of **3a** ( $[H]$ ) and the bromide anion ( $[G]$ ) were prepared for a total concentration of ( $[H]+[G]$ ) to be 5 mM. The  $^1\text{H}$  NMR spectra were recorded and the change in the  $^1\text{H}$  NMR SiOH resonances with a mole fraction of  $[G]$  is listed in Table S6. The Job's plot is shown in Figure S10. The maximum appears at a mole fraction of 0.5 indicating a 1 : 1 stoichiometry.

Table S5 Added amounts of TBABr to **3a** and chemical shift changes of SiOH resonance

| TOTAL Guest ( $\mu\text{L}$ ) | eq   | $\delta$ (ppm) | $\Delta\delta$ (ppm) |
|-------------------------------|------|----------------|----------------------|
| 0                             | 0    | 4.4058         | 0.0000               |
| 10                            | 1.19 | 4.8281         | 0.4223               |
| 20                            | 2.38 | 5.0489         | 0.6431               |
| 30                            | 3.57 | 5.1836         | 0.7778               |
| 50                            | 5.94 | 5.3751         | 0.9693               |
| 80                            | 9.51 | 5.5528         | 1.1470               |
| 100                           | 11.9 | 5.6362         | 1.2304               |
| 120                           | 14.3 | 5.7030         | 1.2972               |
| 160                           | 19.0 | 5.8047         | 1.3989               |

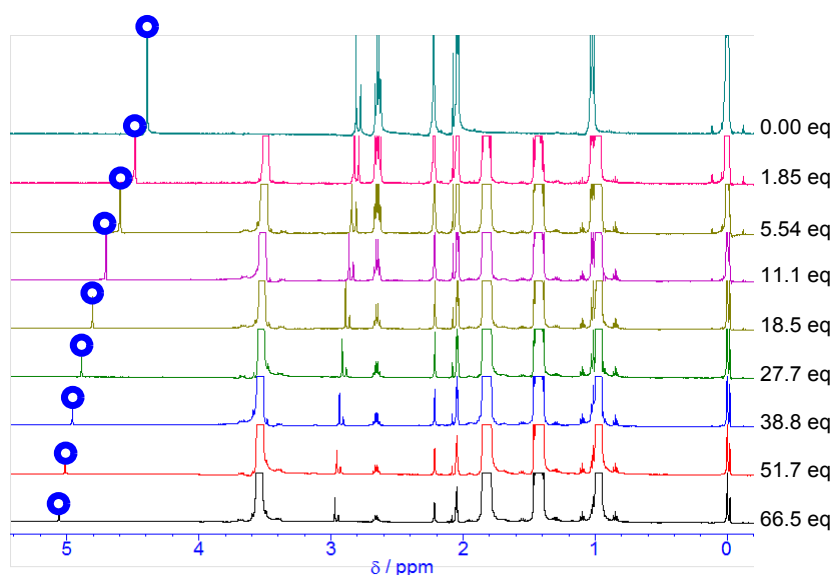

Figure S8  $^1\text{H}$  NMR titration spectra of **3a** with TBABr.

The SiOH chemical shifts are marked with circles.

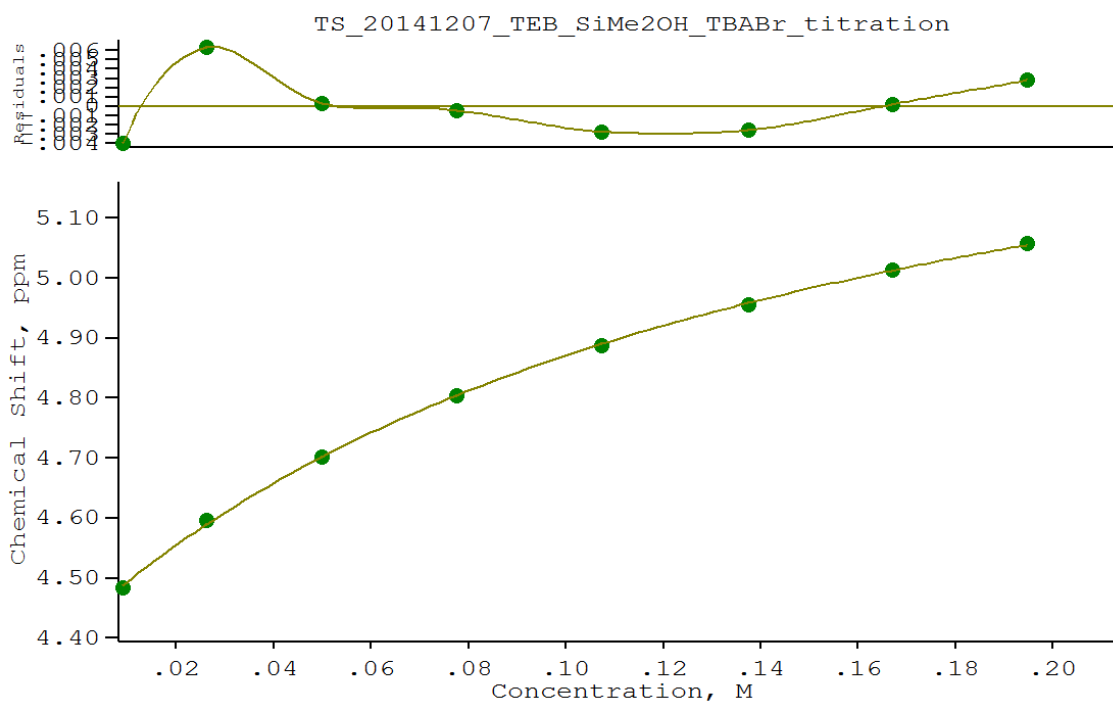

Figure S9 Determination of  $K_a$  using SiOH resonance by WinEQNMR for **3a** and TBABr. The concentration of TBABr is given on the X-axis.

#### Calculation for the titration of **3a** with TBABr

Calculations by WinEQNMR2 Version 2.00 by Michael J. Hynes

Program run at 16:42:34 on 03/19/2015

TS\_20141207\_TEB\_SiMe2OH\_TBABr\_titration

Equilibrium constants are floating point numbers

| NO. | A | PARAMETER   | DELTA     | ERROR     | CONDITION | DESCRIPTION |
|-----|---|-------------|-----------|-----------|-----------|-------------|
| 1   | 1 | 6.93826E+00 | 5.000E-02 | 3.684E-01 | 7.587E+01 | K11         |
| 2   | 1 | 4.42307E+00 | 4.400E-02 | 5.120E-03 | 6.035E+00 | SHIFT_H     |
| 3   | 1 | 5.52666E+00 | 5.100E-02 | 2.581E-02 | 5.279E+01 | SHIFT_HG    |

ORMS ERROR = 3.95E-03 MAX ERROR = 6.32E-03 AT OBS.NO. 2

RESIDUALS SQUARED = 7.81E-05

RFACTOR = 0.0649 PERCENT

| NO.   | A | EXPT. DEL  | CALC. DEL  | RESIDUAL    |             | % DEV      | WEIGHT     | Cl- |
|-------|---|------------|------------|-------------|-------------|------------|------------|-----|
| TBABr |   | pH         |            |             |             |            |            |     |
| 1     | 1 | 4.4832E+00 | 4.4872E+00 | -4.0088E-03 | -8.9418E-02 | 1.0000E+00 | 9.1200E-03 |     |
|       |   | 4.9400E-03 | 0.0000E+00 |             |             |            |            |     |
| 2     | 1 | 4.5963E+00 | 4.5900E+00 | 6.3171E-03  | 1.3744E-01  | 1.0000E+00 | 2.6330E-02 |     |
|       |   | 4.7500E-03 | 0.0000E+00 |             |             |            |            |     |
| 3     | 1 | 4.7026E+00 | 4.7022E+00 | 3.5524E-04  | 7.5542E-03  | 1.0000E+00 | 4.9840E-02 |     |
|       |   | 4.5000E-03 | 0.0000E+00 |             |             |            |            |     |
| 4     | 1 | 4.8043E+00 | 4.8047E+00 | -4.1866E-04 | -8.7143E-03 | 1.0000E+00 | 7.7520E-02 |     |
|       |   | 4.2000E-03 | 0.0000E+00 |             |             |            |            |     |
| 5     | 1 | 4.8877E+00 | 4.8904E+00 | -2.7156E-03 | -5.5560E-02 | 1.0000E+00 | 1.0734E-01 |     |
|       |   | 3.8700E-03 | 0.0000E+00 |             |             |            |            |     |
| 6     | 1 | 4.9564E+00 | 4.9589E+00 | -2.5415E-03 | -5.1278E-02 | 1.0000E+00 | 1.3757E-01 |     |
|       |   | 3.5500E-03 | 0.0000E+00 |             |             |            |            |     |
| 7     | 1 | 5.0132E+00 | 5.0130E+00 | 2.1124E-04  | 4.2137E-03  | 1.0000E+00 | 1.6697E-01 |     |
|       |   | 3.2300E-03 | 0.0000E+00 |             |             |            |            |     |
| 8     | 1 | 5.0581E+00 | 5.0553E+00 | 2.8100E-03  | 5.5554E-02  | 1.0000E+00 | 1.9471E-01 |     |
|       |   | 2.9300E-03 | 0.0000E+00 |             |             |            |            |     |

TOLERANCE ON SUM OF SQUARES 0.0100

TOLERANCE ON EIGEN VALUES 0.0001

CONVERGANCE AFTER 5 ITERATIONS

Table S6 Data for Job's plot of **3a** with TBABr

| Host ( $\mu\text{L}$ ) | Guest ( $\mu\text{L}$ ) | [H]/([H]+[G]) | $\delta$ (ppm) | $\Delta\delta$ [H]/([H]+[G]) |
|------------------------|-------------------------|---------------|----------------|------------------------------|
| 50                     | 450                     | 0.1           | 4.4580         | 0.0057                       |
| 100                    | 400                     | 0.2           | 4.4525         | 0.0103                       |
| 150                    | 350                     | 0.3           | 4.4479         | 0.0140                       |
| 200                    | 300                     | 0.4           | 4.4424         | 0.0165                       |
| 250                    | 250                     | 0.5           | 4.4365         | 0.0177                       |
| 300                    | 200                     | 0.6           | 4.4296         | 0.0171                       |
| 350                    | 150                     | 0.7           | 4.4223         | 0.0148                       |
| 450                    | 50                      | 0.9           | 4.4122         | 0.0099                       |
| 500                    | 0                       | 1             | 4.4012         | 0.0000                       |

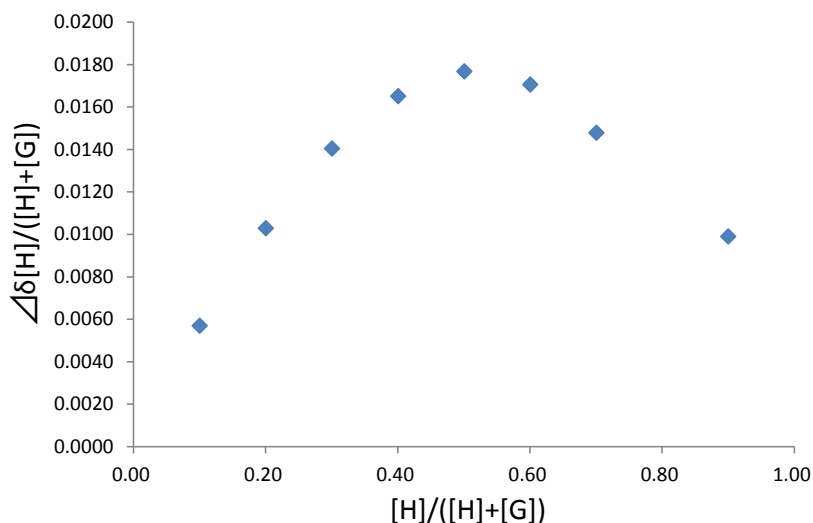

Figure S10 Job's plot of **3a** with TBABr

**For the titrations and Job's plot of 3b and the chloride anion**

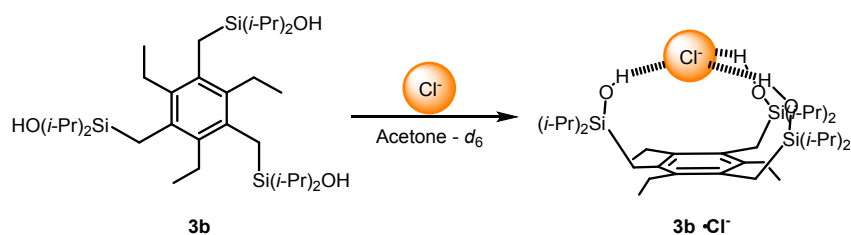

**3a** (56.3 mg, 0.103 mmol) was placed in a 2 mL volumetric flask, and was then dissolved in Acetone- $d_6$ . By adding a drop of TMS as the internal standard, the solution came to 2 mL total volume. From the stock solution, 480  $\mu\text{L}$  of solution **3b** was placed in a 5 mL volumetric flask using a microsyringe. The resulting host solution was diluted with Acetone- $d_6$  up to 5 mL, yielding a 4.94 mM host solution.

TBACl (77.2 mg, 0.278 mmol) was placed in a 2 mL volumetric flask, and was then dissolved in Acetone- $d_6$  up to 2 mL, yielding a 139 mM guest solution. After 500  $\mu\text{L}$  of host solution (4.94 mM) was added to a NMR tube, the  $^1\text{H}$  NMR spectra was recorded. The host solution was titrated by adding an incremental amount of the 139 mM guest solution as shown in Table S7. The gradual downshift of the SiOH resonance was monitored as shown in Figure S11. The association constant  $K_a = 73.0 \text{ M}^{-1}$  was obtained by titration curve fitting using the WinEQNMR program shown in Figure S12. For Job's plots, different stock solutions were prepared as follows.

**3b** (82.7 mg, 0.151 mmol) was placed in a 2 mL volumetric flask, and was then dissolved in Acetone- $d_6$ . By adding a drop of TMS as the internal standard, the solution came to 2 mL total volume.

From the stock solution, 330  $\mu\text{L}$  of solution **3b** was placed in a 5 mL volumetric flask using a

microsyringe. The resulting host solution was diluted with Acetone- $d_6$  up to 5 mL, yielding a 4.99 mM host solution.

TBACl (51.3 mg, 0.185 mmol) was placed in a 2 mL volumetric flask, and was then dissolved in Acetone- $d_6$  up to 2 mL. From the resulting guest solution, 27.0  $\mu\text{L}$  of solution was placed in a 5 mL volumetric flask using a microsyringe, and was then dissolved in Acetone- $d_6$  up to 2 mL, yielding 4.98 mM of guest solution.

As shown in Table S8, the NMR samples with different proportions of **3b** ( $[H]$ ) and the chloride anion ( $[G]$ ) were prepared for the total concentration of ( $[H]+[G]$ ) to be 5 mM. The  $^1\text{H}$  NMR spectra were recorded and the change in the  $^1\text{H}$  NMR SiOH resonances with a mole fraction of  $[G]$  is listed in Table S8. The Job's plot is shown in Figure S13. The maximum appears at a mole fraction of 0.5 indicating an 1 : 1 stoichiometry.

Table S7 Added amounts of TBACl to **3b** and chemical shift changes of SiOH resonance

| TOTAL Guest ( $\mu\text{L}$ ) | eq   | $\delta$ (ppm) | $\Delta\delta$ (ppm) |
|-------------------------------|------|----------------|----------------------|
| 0                             | 0    | 4.1328         | 0.0000               |
| 25                            | 1.41 | 4.5533         | 0.4205               |
| 50                            | 2.81 | 4.7530         | 0.6202               |
| 75                            | 4.22 | 4.8648         | 0.7320               |
| 100                           | 5.62 | 4.9436         | 0.8108               |
| 125                           | 7.03 | 5.0004         | 0.8676               |
| 150                           | 8.44 | 5.0425         | 0.9097               |
| 175                           | 9.84 | 5.0764         | 0.9436               |
| 200                           | 11.3 | 5.1048         | 0.9720               |

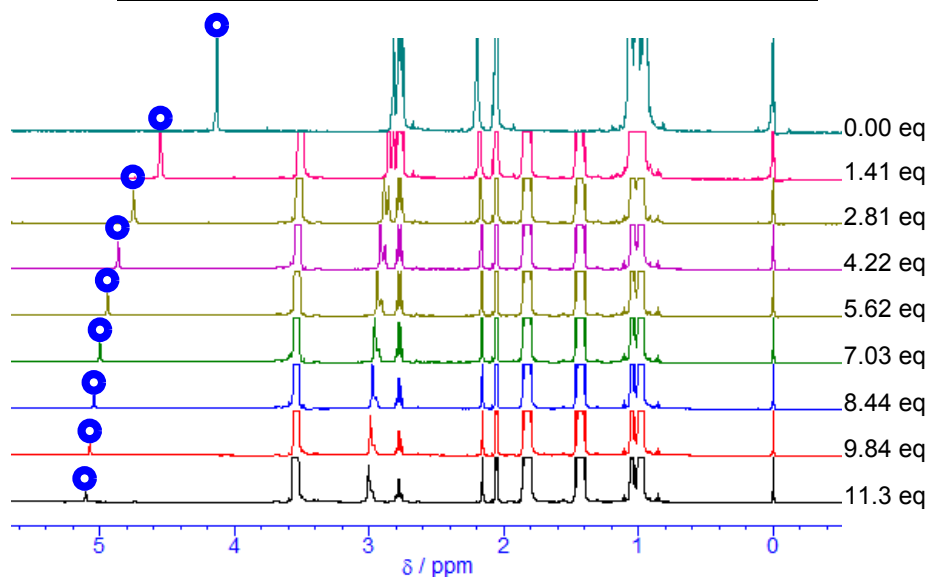

Figure S11  $^1\text{H}$  NMR titration spectra of **3b** with TBACl.

The SiOH chemical shifts are marked with circles.

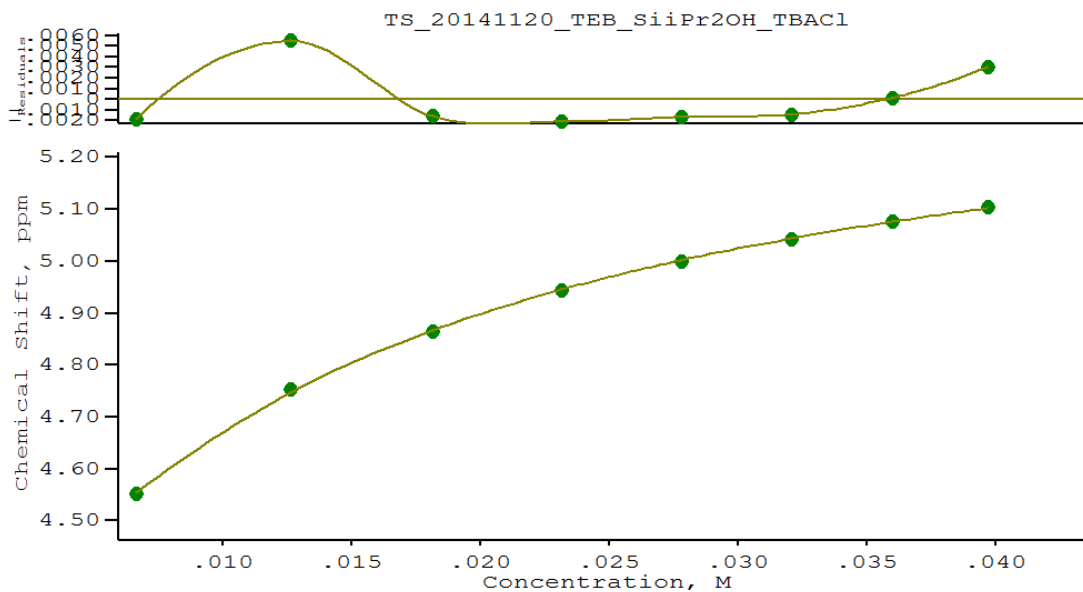

Figure S12 Determination of  $K_a$  using SiOH resonance by WinEQNMR for **3b** and TBACl. The concentration of TBACl is given on the X-axis.

#### Calculation for the titration of **3b** with TBACl

Calculations by WinEQNMR2 Version 2.00 by Michael J. Hynes

Program run at 13:00:27 on 11/21/2014

TS\_20141120\_TEB\_SiiPr2OH\_TBACl

Equilibrium constants are floating point numbers

| NO. | A | PARAMETER   | DELTA     | ERROR     | CONDITION | DESCRIPTION |
|-----|---|-------------|-----------|-----------|-----------|-------------|
| 1   | 1 | 7.30049E+01 | 5.000E-01 | 3.791E+00 | 1.288E+02 | K11         |
| 2   | 1 | 4.21703E+00 | 4.100E-02 | 1.281E-02 | 2.390E+01 | SHIFT_H     |
| 3   | 1 | 5.42783E+00 | 5.100E-02 | 1.464E-02 | 5.565E+01 | SHIFT_HG    |

ORMS ERROR = 3.31E-03 MAX ERROR = 5.51E-03 AT OBS.NO. 2

RESIDUALS SQUARED = 5.47E-05

RFACTOR = 0.0531 PERCENT

| NO.      | A | EXPT. DEL  | CALC. DEL  | RESIDUAL    | % DEV       | WEIGHT     | CI-                   |
|----------|---|------------|------------|-------------|-------------|------------|-----------------------|
| receptor |   | pH         |            |             |             |            |                       |
| 1        | 1 | 4.5533E+00 | 4.5551E+00 | -1.8311E-03 | -4.0214E-02 | 1.0000E+00 | 6.6100E-03 4.7000E-03 |

0.0000E+00  
 2 1 4.7530E+00 4.7475E+00 5.5113E-03 1.1595E-01 1.0000E+00 1.2630E-02 4.4900E-03  
 0.0000E+00  
 3 1 4.8648E+00 4.8664E+00 -1.5860E-03 -3.2601E-02 1.0000E+00 1.8120E-02 4.2900E-03  
 0.0000E+00  
 4 1 4.9436E+00 4.9457E+00 -2.1138E-03 -4.2759E-02 1.0000E+00 2.3150E-02 4.1200E-03  
 0.0000E+00  
 5 1 5.0004E+00 5.0021E+00 -1.6727E-03 -3.3452E-02 1.0000E+00 2.7780E-02 3.9500E-03  
 0.0000E+00  
 6 1 5.0425E+00 5.0439E+00 -1.4272E-03 -2.8303E-02 1.0000E+00 3.2050E-02 3.8000E-03  
 0.0000E+00  
 7 1 5.0764E+00 5.0762E+00 1.7405E-04 3.4285E-03 1.0000E+00 3.6010E-02 3.6600E-03  
 0.0000E+00  
 8 1 5.1048E+00 5.1018E+00 3.0165E-03 5.9091E-02 1.0000E+00 3.9680E-02 3.5300E-03  
 0.0000E+00

TOLERANCE ON SUM OF SQUARES 0.0100

TOLERANCE ON EIGEN VALUES 0.0001

CONVERGANCE AFTER 4 ITERATIONS

Table S8 Data for Job's plot of **3b** with TBACl

| Host ( $\mu\text{L}$ ) | Guest ( $\mu\text{L}$ ) | $[\text{H}]/([\text{H}]+[\text{G}])$ | $\delta$ (ppm) | $\Delta\delta$ $[\text{H}]/([\text{H}]+[\text{G}])$ |
|------------------------|-------------------------|--------------------------------------|----------------|-----------------------------------------------------|
| 50                     | 450                     | 0.1                                  | 4.5185         | 0.0390                                              |
| 100                    | 400                     | 0.2                                  | 4.4846         | 0.0711                                              |
| 150                    | 350                     | 0.3                                  | 4.4406         | 0.0935                                              |
| 200                    | 300                     | 0.4                                  | 4.4104         | 0.1126                                              |
| 250                    | 250                     | 0.5                                  | 4.3673         | 0.1191                                              |
| 300                    | 200                     | 0.6                                  | 4.3215         | 0.1155                                              |
| 350                    | 150                     | 0.7                                  | 4.2748         | 0.1020                                              |
| 450                    | 50                      | 0.9                                  | 4.1822         | 0.0478                                              |
| 500                    | 0                       | 1                                    | 4.1291         | 0.0000                                              |

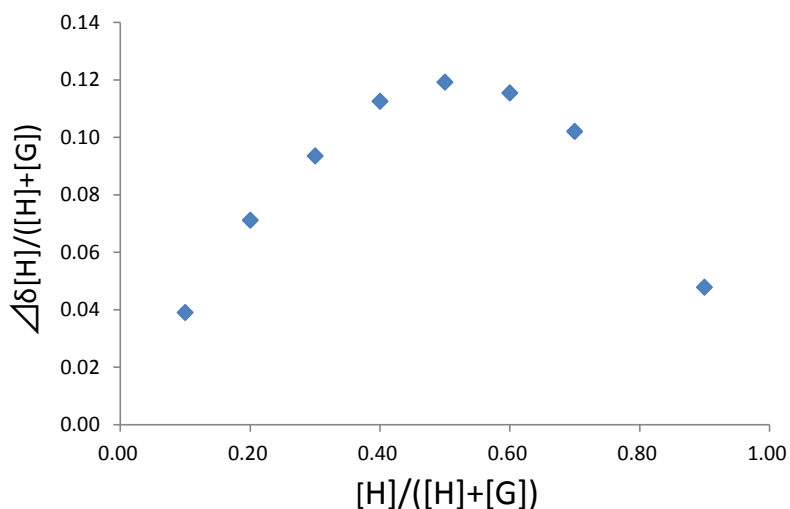

Figure S13 Job's plot of **3b** with TBACl

**For the titrations and Job's plot of 3b and the Bromide ion**

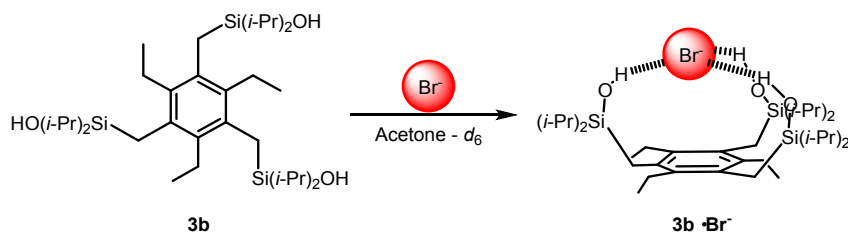

**3b** (63.2 mg, 0.116 mmol) was placed in a 2 mL volumetric flask, and was then dissolved in Acetone- $d_6$ . By adding TMS as the internal standard, the solution came to 2 mL total volume. From the stock solution, 430  $\mu$ L of solution **3b** was placed in a 5 mL volumetric flask using a microsyringe. The resulting host solution was diluted with Acetone- $d_6$  up to 5 mL, yielding a 4.97 mM host solution.

TBABr (2.7 mg, 0.672 mmol) was placed in a 2 mL volumetric flask, and was then dissolved in Acetone- $d_6$  up to 2 mL, yielding a 336 mM guest solution.

From the resulting guest solution, 74  $\mu$ L of solution was placed in a 5 mL volumetric flask using a microsyringe, and was then dissolved in Acetone- $d_6$  up to 5 mL, yielding 4.97 mM of guest solution.

After 500  $\mu$ L of the host solution (4.97 mM) was added to a NMR tube, the  $^1\text{H}$  NMR spectra was recorded. The host solution was titrated by adding an incremental amount of the 336 mM guest solution as shown in Table S9.

The gradual downshift of the SiOH resonance was monitored as shown in Figure S14. The association constant  $K_a = 9.61 \text{ M}^{-1}$  was obtained by titration curve fitting using the WinEQNMR program shown in Figure S15.



As shown in Table S10, the NMR samples with different proportions of **3b** ( $[H]$ ) and the bromide anion ( $[G]$ ) were prepared for the total concentration of ( $[H]+[G]$ ) to be 5 mM. The  $^1\text{H}$  NMR spectra were recorded and the change in the  $^1\text{H}$  NMR SiOH resonances with a mole fraction of  $[G]$  is listed in Table S10.

The Job's plot is shown in Figure S16. The maximum appears at a mole fraction of 0.5 indicating an 1 : 1 stoichiometry.

Table S9 Added amounts of TBABr to **3b** and chemical shift changes of SiOH resonance

| TOTAL Guest ( $\mu\text{L}$ ) | eq   | $\delta$ (ppm) | $\Delta\delta$ (ppm) |
|-------------------------------|------|----------------|----------------------|
| 0                             | 0    | 4.1337         | 0.0000               |
| 50                            | 6.76 | 4.2674         | 0.1337               |
| 100                           | 13.5 | 4.3655         | 0.2318               |
| 150                           | 20.3 | 4.4195         | 0.2858               |
| 200                           | 27.0 | 4.4589         | 0.3252               |
| 250                           | 33.8 | 4.4891         | 0.3554               |
| 300                           | 40.6 | 4.5130         | 0.3793               |
| 350                           | 47.3 | 4.5331         | 0.3994               |

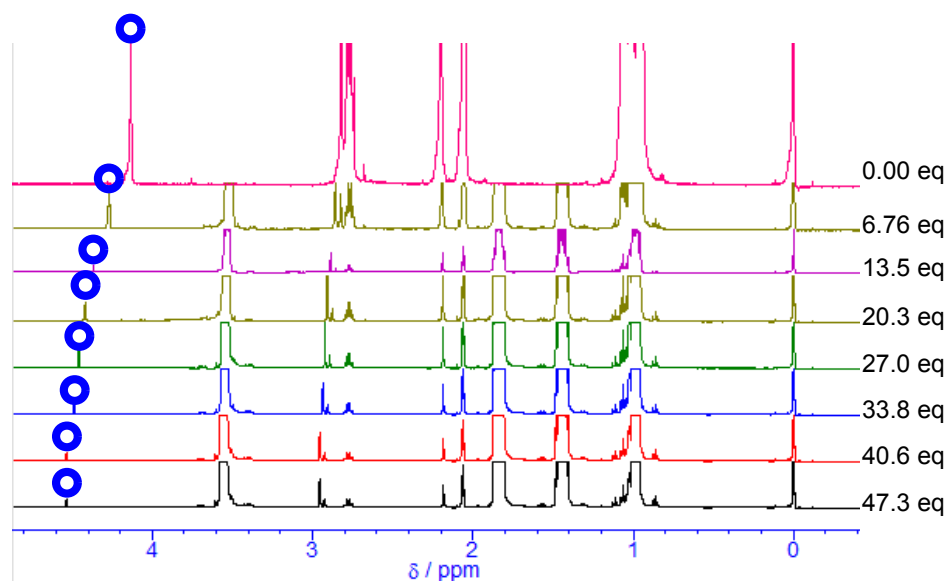

Figure S14  $^1\text{H}$  NMR titration spectra of **3b** with TBABr.

The SiOH chemical shifts are marked with circles.

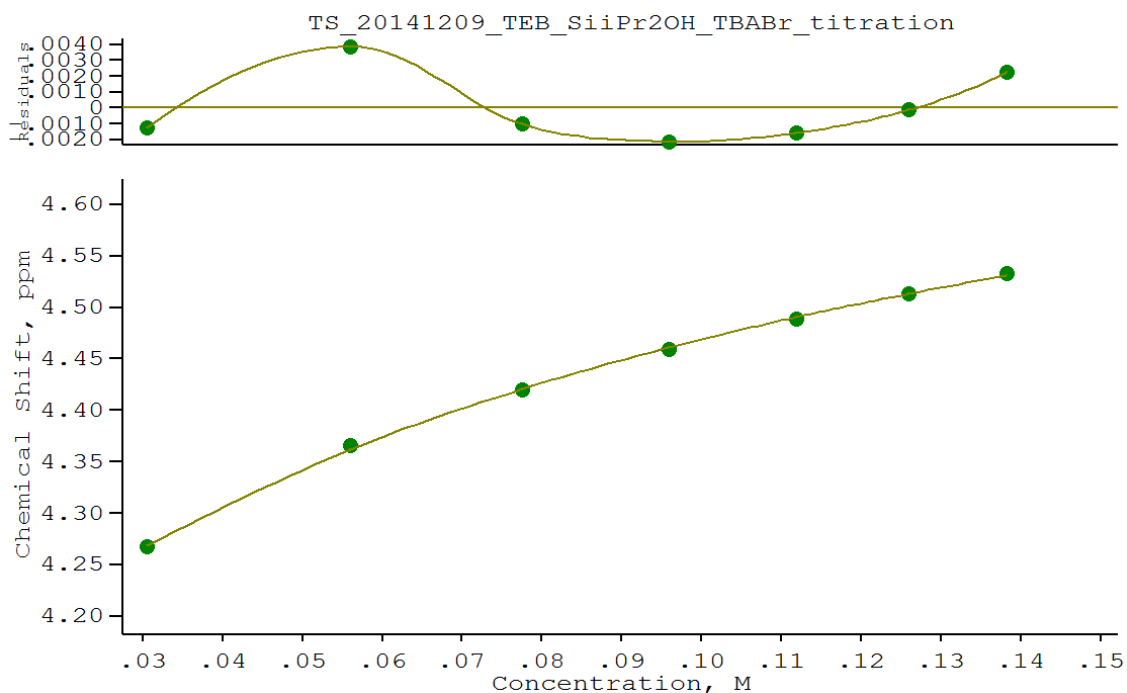

Figure S15 Determination of  $K_a$  using SiOH resonance by WinEQNMR for **3b** and TBABr. The concentration of TBABr is given on the X-axis.

**Calculation for the titration of 3b with TBABr**

Calculations by WinEQNMR2 Version 2.00 by Michael J. Hynes

Program run at 16:39:19 on 03/19/2015

TS\_20141209\_TEB\_SiiPr2OH\_TBABr\_titration

Equilibrium constants are floating point numbers

| NO. | A | PARAMETER   | DELTA     | ERROR     | CONDITION | DESCRIPTION |
|-----|---|-------------|-----------|-----------|-----------|-------------|
| 1   | 1 | 9.61408E+00 | 5.000E-02 | 1.141E+00 | 4.120E+02 | K11         |
| 2   | 1 | 4.10104E+00 | 4.100E-02 | 1.293E-02 | 5.138E+01 | SHIFT_H     |
| 3   | 1 | 4.85751E+00 | 4.500E-02 | 3.182E-02 | 1.997E+02 | SHIFT_HG    |

ORMS ERROR = 2.72E-03 MAX ERROR = 3.88E-03 AT OBS.NO. 2

RESIDUALS SQUARED = 2.96E-05

RFACTOR = 0.0463 PERCENT

| NO. | A | EXPT. DEL | CALC. DEL | RESIDUAL | % DEV | WEIGHT | Br- |
|-----|---|-----------|-----------|----------|-------|--------|-----|
|-----|---|-----------|-----------|----------|-------|--------|-----|

| receptor | pH         |            |             |             |            |            |  |
|----------|------------|------------|-------------|-------------|------------|------------|--|
| 1 1      | 4.2674E+00 | 4.2687E+00 | -1.2546E-03 | -2.9399E-02 | 1.0000E+00 | 3.0530E-02 |  |
|          | 4.5200E-03 | 0.0000E+00 |             |             |            |            |  |
| 2 1      | 4.3655E+00 | 4.3616E+00 | 3.8757E-03  | 8.8781E-02  | 1.0000E+00 | 5.5960E-02 |  |
|          | 4.1400E-03 | 0.0000E+00 |             |             |            |            |  |
| 3 1      | 4.4195E+00 | 4.4205E+00 | -1.0233E-03 | -2.3154E-02 | 1.0000E+00 | 7.7490E-02 |  |
|          | 3.8200E-03 | 0.0000E+00 |             |             |            |            |  |
| 4 1      | 4.4589E+00 | 4.4610E+00 | -2.1257E-03 | -4.7674E-02 | 1.0000E+00 | 9.5940E-02 |  |
|          | 3.5500E-03 | 0.0000E+00 |             |             |            |            |  |
| 5 1      | 4.4891E+00 | 4.4907E+00 | -1.5645E-03 | -3.4851E-02 | 1.0000E+00 | 1.1193E-01 |  |
|          | 3.3100E-03 | 0.0000E+00 |             |             |            |            |  |
| 6 1      | 4.5130E+00 | 4.5131E+00 | -1.3018E-04 | -2.8845E-03 | 1.0000E+00 | 1.2592E-01 |  |
|          | 3.1000E-03 | 0.0000E+00 |             |             |            |            |  |
| 7 1      | 4.5331E+00 | 4.5309E+00 | 2.2268E-03  | 4.9124E-02  | 1.0000E+00 | 1.3826E-01 |  |
|          | 2.9200E-03 | 0.0000E+00 |             |             |            |            |  |

TOLERANCE ON SUM OF SQUARES 0.0100

TOLERANCE ON EIGEN VALUES 0.0001

CONVERGANCE AFTER 4 ITERATIONS

Table S10 Data for Job's plot of **3b** with TBABr

| Host ( $\mu\text{L}$ ) | Guest ( $\mu\text{L}$ ) | $[\text{H}]/([\text{H}]+[\text{G}])$ | $\delta$ (ppm) | $\Delta\delta$ $[\text{H}]/([\text{H}]+[\text{G}])$ |
|------------------------|-------------------------|--------------------------------------|----------------|-----------------------------------------------------|
| 50                     | 450                     | 0.1                                  | 4.1685         | 0.0039                                              |
| 100                    | 400                     | 0.2                                  | 4.1648         | 0.0071                                              |
| 150                    | 350                     | 0.3                                  | 4.1621         | 0.0099                                              |
| 200                    | 300                     | 0.4                                  | 4.1575         | 0.0114                                              |
| 250                    | 250                     | 0.5                                  | 4.1566         | 0.0137                                              |
| 300                    | 200                     | 0.6                                  | 4.1511         | 0.0132                                              |
| 350                    | 150                     | 0.7                                  | 4.1465         | 0.0122                                              |
| 450                    | 50                      | 0.9                                  | 4.1392         | 0.0091                                              |
| 500                    | 0                       | 1                                    | 4.1291         | 0.0000                                              |

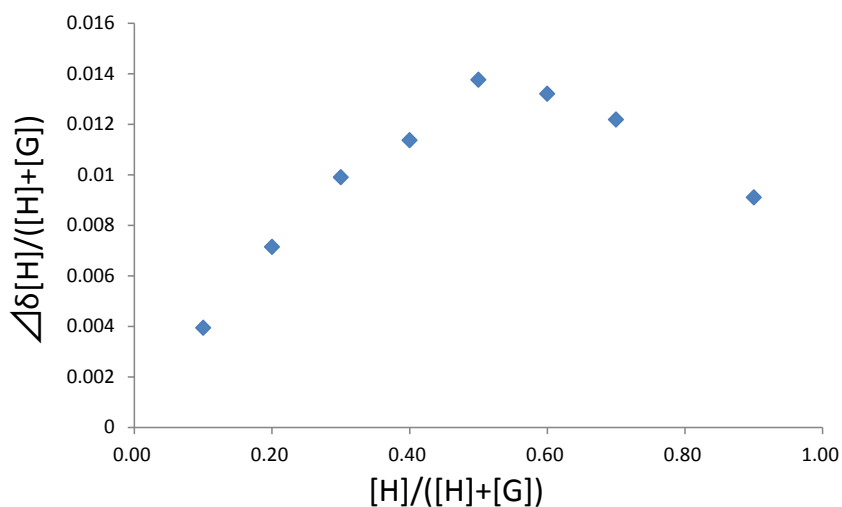

Figure S16 Job's plot of **3b** with TBABr

**For the titrations and Job's plot of 3c and the chloride ion**

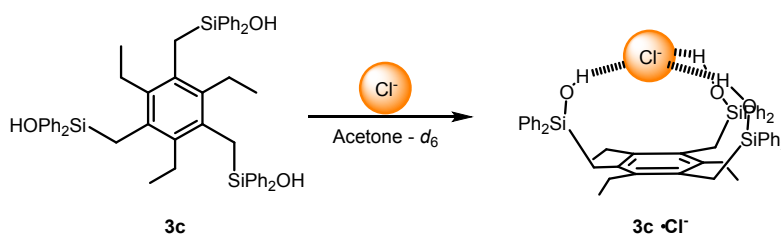

**3c** (96.9 mg, 0.121 mmol) was placed in a 2 mL volumetric flask, and was then dissolved in Acetone- $d_6$ . By adding a drop of TMS as the internal standard, the solution came to 2 mL total volume. From the stock solution, 400  $\mu\text{L}$  of solution **3c** was placed in a 5 mL volumetric flask using a microsyringe. The resulting host solution was diluted with Acetone- $d_6$  up to 5 mL, yielding a 4.85 mM host solution.

TBACl (79.0 mg, 0.284 mmol) was placed in a 2 mL volumetric flask, and was then dissolved in Acetone- $d_6$  up to 2 mL, yielding a 142 mM guest solution.

After 500  $\mu\text{L}$  of the host solution (4.85 mM) was added to a NMR tube, the  $^1\text{H}$  NMR spectra was recorded. The host solution was titrated by adding an incremental amount of the 142 mM guest solution as shown in Table S11.

The gradual downshift of the SiOH resonance was monitored as shown in Figure S17. The association constant  $K_a = 6829 \text{ M}^{-1}$  was obtained by titration curve fitting using the WinEQNMR program shown in Figure S18.

For Job's plots, different stock solutions were prepared as follows.

**3c** (7.99 mg, 0.01 mmol) was placed in a 2 mL volumetric flask, and was then diluted in Acetone- $d_6$ . By adding a drop of TMS as the internal standard, the solution volume was 2 mL, yielding a 5.0 mM

host solution.

TBACl (6.95 mg, 0.025 mmol) was placed in a 5 mL volumetric flask, and was then dissolved in Acetone- $d_6$  up to 2 mL, yielding a 5.0 mM guest solution.

As shown in Table S12, the NMR samples with different proportions of **3c** ( $[H]$ ) and the chloride anion ( $[G]$ ) were prepared for the total concentration of ( $[H]+[G]$ ) to be 5 mM. The  $^1\text{H}$  NMR spectra were recorded and the change in  $^1\text{H}$  NMR SiOH resonances with a mole fraction  $[G]$  is listed in Table S12.

The Job's plot is shown in Figure S19. The maximum appears at a mole fraction of 0.5 indicating an 1 : 1 stoichiometry.

Table S11 Added amounts of TBACl to **3c** and chemical shift changes of SiOH resonance

| TOTAL Guest ( $\mu\text{L}$ ) | eq   | $\delta$ (ppm) | $\Delta\delta$ (ppm) |
|-------------------------------|------|----------------|----------------------|
| 0                             | 0    | 4.6660         | 0.0000               |
| 10                            | 0.59 | 5.8304         | 1.1644               |
| 20                            | 1.17 | 6.4946         | 1.8286               |
| 40                            | 2.34 | 6.6458         | 1.9798               |
| 60                            | 3.52 | 6.6650         | 1.9990               |
| 80                            | 4.69 | 6.6723         | 2.0063               |
| 100                           | 5.86 | 6.6761         | 2.0101               |
| 120                           | 7.03 | 6.6763         | 2.0103               |

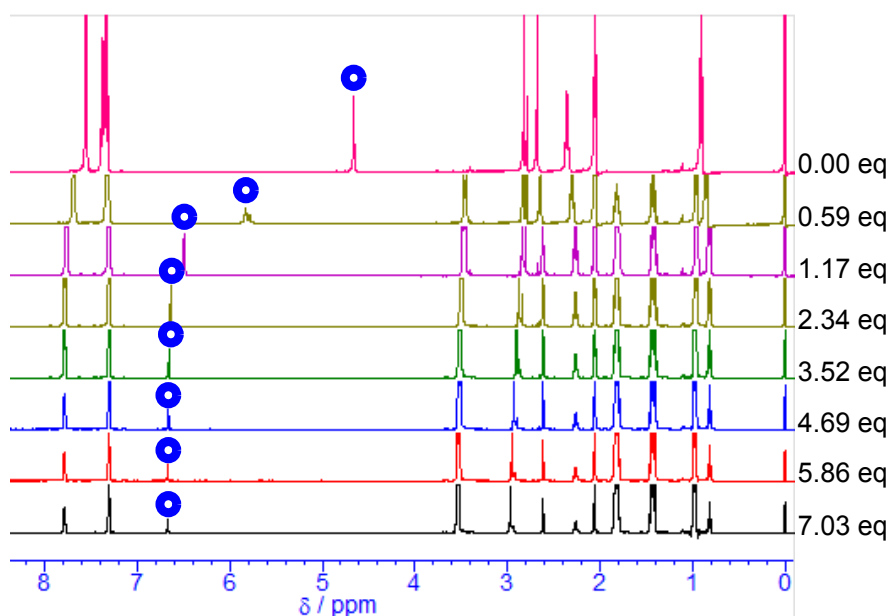

Figure S17  $^1\text{H}$  NMR titration spectra of **3c** with TBACl.

The SiOH chemical shifts are marked with circles.

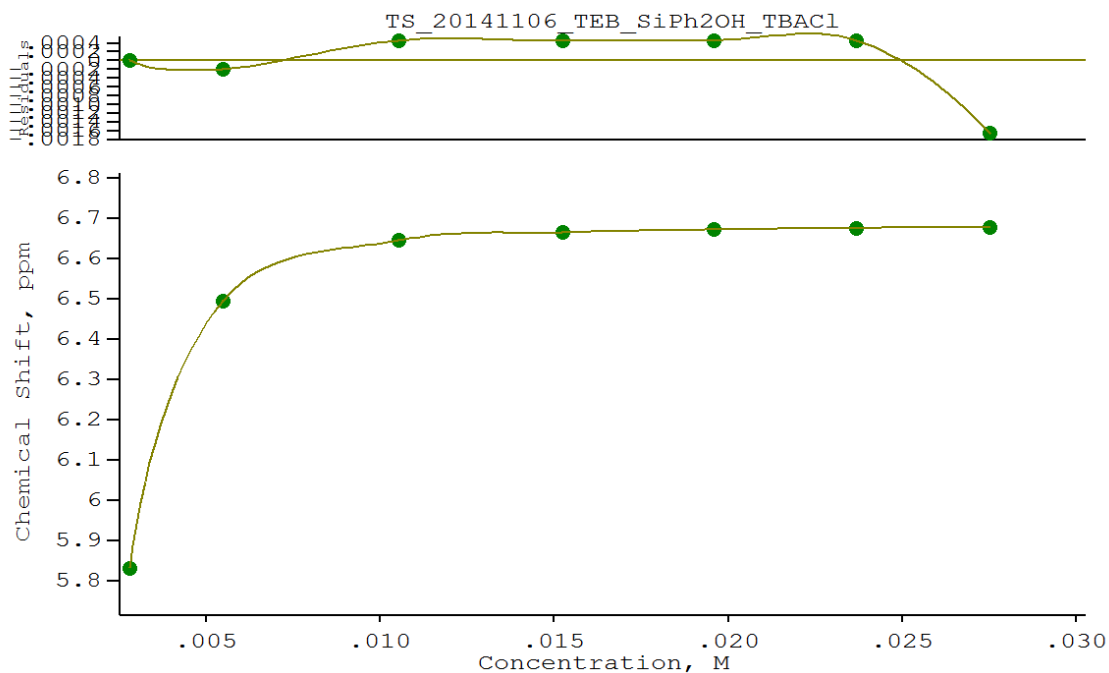

Figure S18 Determination of  $K_a$  using SiOH resonance by WinEQNMR for **3c** and TBACl. The concentration of TBACl is given on the X-axis.

#### Calculation for the titration of **3c** with TBACl

Calculations by WinEQNMR2 Version 2.00 by Michael J. Hynes

Program run at 16:34:42 on 03/19/2015

TS\_20141106\_TEB\_SiPh2OH\_TBACl

Equilibrium constants are floating point numbers

| NO. | A | PARAMETER   | DELTA     | ERROR     | CONDITION | DESCRIPTION |
|-----|---|-------------|-----------|-----------|-----------|-------------|
| 1   | 1 | 6.82924E+03 | 3.000E+01 | 6.805E+01 | 2.647E+00 | K11         |
| 2   | 1 | 4.78256E+00 | 4.700E-02 | 2.572E-03 | 1.577E+00 | SHIFT_H     |
| 3   | 1 | 6.68910E+00 | 6.700E-02 | 5.388E-04 | 1.937E+00 | SHIFT_HG    |

ORMS ERROR = 9.48E-04 MAX ERROR = 1.64E-03 AT OBS.NO. 7

RESIDUALS SQUARED = 3.59E-06

RFACTOR = 0.0110 PERCENT

| NO. | A | EXPT. DEL | CALC. DEL | RESIDUAL | % DEV | WEIGHT | CI- |
|-----|---|-----------|-----------|----------|-------|--------|-----|
|-----|---|-----------|-----------|----------|-------|--------|-----|

| receptor |   | pH         |            |             |             |            |            |
|----------|---|------------|------------|-------------|-------------|------------|------------|
| 1        | 1 | 5.8304E+00 | 5.8304E+00 | 1.9550E-05  | 3.3532E-04  | 1.0000E+00 | 2.7900E-03 |
|          |   | 4.7500E-03 | 0.0000E+00 |             |             |            |            |
| 2        | 1 | 6.4946E+00 | 6.4948E+00 | -1.9646E-04 | -3.0249E-03 | 1.0000E+00 | 5.4700E-03 |
|          |   | 4.6600E-03 | 0.0000E+00 |             |             |            |            |
| 3        | 1 | 6.6458E+00 | 6.6453E+00 | 4.6349E-04  | 6.9741E-03  | 1.0000E+00 | 1.0530E-02 |
|          |   | 4.4900E-03 | 0.0000E+00 |             |             |            |            |
| 4        | 1 | 6.6650E+00 | 6.6646E+00 | 4.4918E-04  | 6.7394E-03  | 1.0000E+00 | 1.5230E-02 |
|          |   | 4.3300E-03 | 0.0000E+00 |             |             |            |            |
| 5        | 1 | 6.6723E+00 | 6.6718E+00 | 4.6778E-04  | 7.0107E-03  | 1.0000E+00 | 1.9600E-02 |
|          |   | 4.1800E-03 | 0.0000E+00 |             |             |            |            |
| 6        | 1 | 6.6761E+00 | 6.6756E+00 | 4.6062E-04  | 6.8996E-03  | 1.0000E+00 | 2.3690E-02 |
|          |   | 4.0400E-03 | 0.0000E+00 |             |             |            |            |
| 7        | 1 | 6.6763E+00 | 6.6779E+00 | -1.6446E-03 | -2.4634E-02 | 1.0000E+00 | 2.7510E-02 |
|          |   | 3.9100E-03 | 0.0000E+00 |             |             |            |            |

TOLERANCE ON SUM OF SQUARES 0.0100

TOLERANCE ON EIGEN VALUES 0.0001

CONVERGANCE AFTER 2 ITERATIONS

Table S12 Data for Job's plot of **3c** with TBACl

| Host ( $\mu\text{L}$ ) | Guest ( $\mu\text{L}$ ) | $[\text{H}]/([\text{H}]+[\text{G}])$ | $\delta$ (ppm) | $\Delta\delta$ $[\text{H}]/([\text{H}]+[\text{G}])$ |
|------------------------|-------------------------|--------------------------------------|----------------|-----------------------------------------------------|
| 500                    | 0                       | 1                                    | 4.6599         | 0.0000                                              |
| 50                     | 450                     | 0.1                                  | 6.5989         | 0.1939                                              |
| 100                    | 400                     | 0.2                                  | 6.5538         | 0.3788                                              |
| 150                    | 350                     | 0.3                                  | 6.4794         | 0.5459                                              |
| 200                    | 300                     | 0.4                                  | 6.3454         | 0.6742                                              |
| 250                    | 250                     | 0.5                                  | 6.1137         | 0.7269                                              |
| 300                    | 200                     | 0.6                                  | 5.7358         | 0.6455                                              |
| 350                    | 150                     | 0.7                                  | 5.4330         | 0.5412                                              |
| 450                    | 50                      | 0.9                                  | 4.8545         | 0.1751                                              |

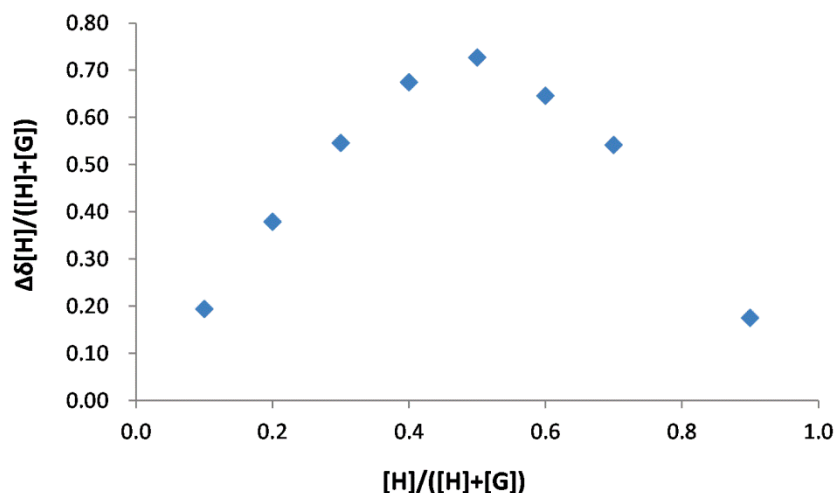

Figure S19 Job's plot of **3c** with TBACl

**For the titrations and Job's plot of 3c and the Bromide ion**

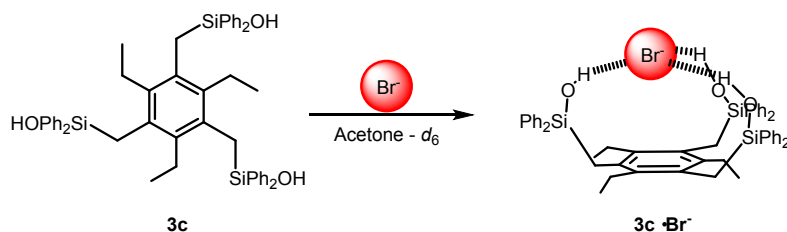

**3c** (102 mg, 0.127 mmol) was placed in a 2 mL volumetric flask, and was then dissolved in Acetone- $d_6$ . By adding TMS as the internal standard, the solution came to 2 mL total volume. From the stock solution, 400  $\mu$ L of solution **3c** was placed in a 5 mL volumetric flask using a microsyringe. The resulting host solution was diluted with Acetone- $d_6$  up to 5 mL, yielding a 5.08 mM host solution.

TBABr (160 mg, 0.945 mmol) was placed in a 2 mL volumetric flask, and was then dissolved in Acetone- $d_6$  up to 2 mL, yielding 99.0 mM of guest solution. From the resulting guest solution, 200  $\mu$ L of solution was placed in a 5 mL volumetric flask using a microsyringe, and was then dissolved in Acetone- $d_6$  up to 5 mL, yielding 4.95 mM of guest solution.

After 500  $\mu$ L of the host solution (5.08 mM) was added to a NMR tube, the  $^1\text{H}$  NMR spectra was recorded. The host solution was titrated by adding an incremental amount of 99 mM guest solution as shown in Table S13.

The gradual downfield of SiOH resonance was monitored as shown in Figure S20. The association constant  $94.4 \text{ M}^{-1}$  was obtained by titration curve fitting using the WinEQNMR program shown in Figure S21.



As shown in Table S14, the NMR samples with different proportions of **3c** ( $[H]$ ) and the bromide anion ( $[G]$ ) were prepared for the total concentration of ( $[H]+[G]$ ) to be 5 mM.

The  $^1\text{H}$  NMR spectra were recorded and the change in the  $^1\text{H}$  NMR SiOH resonances with a mole fraction of  $[G]$  is listed in Table S14. The Job's plot is shown in Figure S22. The maximum appears at a mole fraction of 0.5 indicating an 1 : 1 stoichiometry.

Table S13 Added amounts of TBABr to **3c** and chemical shift changes of SiOH resonance

| TOTAL Guest ( $\mu\text{L}$ ) | eq   | $\delta$ (ppm) | $\Delta\delta$ (ppm) |
|-------------------------------|------|----------------|----------------------|
| 0                             | 0    | 4.6843         | 0.0000               |
| 20                            | 0.78 | 4.9280         | 0.2437               |
| 40                            | 1.56 | 5.0791         | 0.3948               |
| 60                            | 2.34 | 5.1781         | 0.4938               |
| 80                            | 3.11 | 5.2422         | 0.5579               |
| 100                           | 3.89 | 5.2908         | 0.6065               |
| 200                           | 7.78 | 5.4319         | 0.7476               |
| 300                           | 11.7 | 5.4969         | 0.8126               |
| 400                           | 15.6 | 5.5299         | 0.8456               |
| 500                           | 19.5 | 5.5510         | 0.8667               |
| 600                           | 23.4 | 5.5528         | 0.8685               |

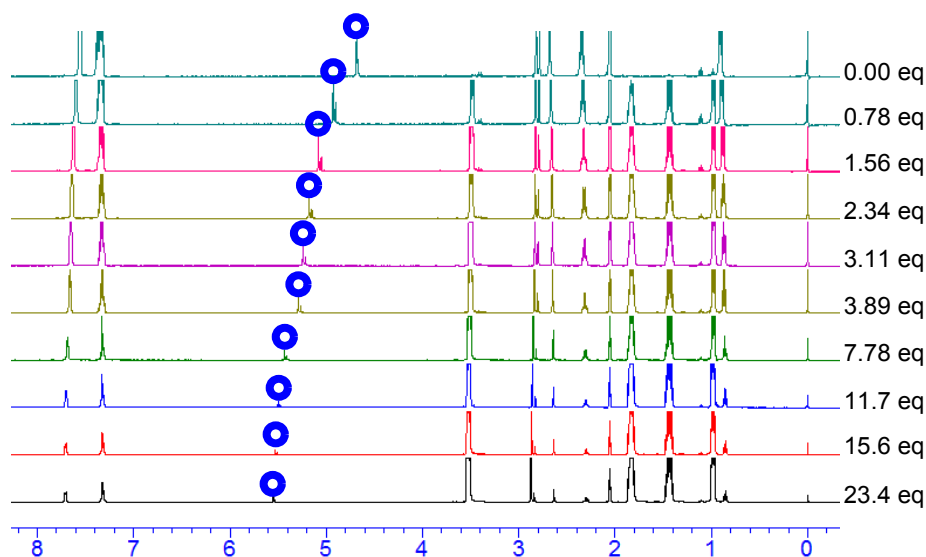

Figure S20  $^1\text{H}$  NMR titration spectra of **3c** with TBABr.

The SiOH chemical shifts are marked with circles.

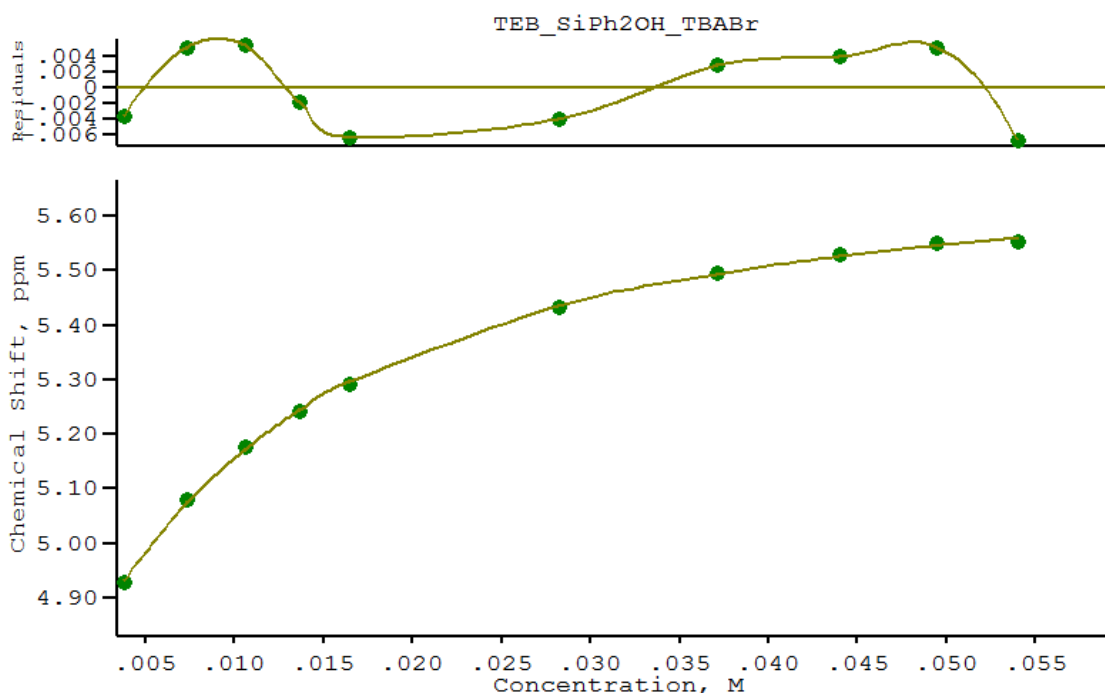

Figure S21 Determination of  $K_a$  using SiOH resonance by WinEQNMR for **3c** and TBABr. The concentration of TBABr is given on the X-axis.

### Calculation for titration of **3c** with TBABr

Calculations by WinEQNMR2 Version 2.00 by Michael J. Hynes

Program run at 20:45:23 on 10/03/2014

TEB\_SiPh2OH\_TBABr

Equilibrium constants are floating point numbers

| NO. | A | PARAMETER   | DELTA     | ERROR     | CONDITION | DESCRIPTION |
|-----|---|-------------|-----------|-----------|-----------|-------------|
| 1   | 1 | 9.43872E+01 | 2.000E+00 | 4.769E+00 | 2.824E+01 | K11         |
| 2   | 1 | 4.72155E+00 | 4.700E-02 | 1.146E-02 | 8.478E+00 | SHIFT_H     |
| 3   | 1 | 5.72955E+00 | 5.600E-02 | 9.437E-03 | 1.158E+01 | SHIFT_HG    |

ORMS ERROR = 5.58E-03 MAX ERROR = 6.71E-03 AT OBS.NO. 10

RESIDUALS SQUARED = 2.18E-04

RFACTOR = 0.0876 PERCENT

| NO. A      | EXPT. DEL  | CALC. DEL  | RESIDUAL    | % DEV       | WEIGHT     | Br-        | TEB        |
|------------|------------|------------|-------------|-------------|------------|------------|------------|
| pH         |            |            |             |             |            |            |            |
| 1 1        | 4.9280E+00 | 4.9315E+00 | -3.5057E-03 | -7.1139E-02 | 1.0000E+00 | 3.8100E-03 | 4.8900E-03 |
| 0.0000E+00 |            |            |             |             |            |            |            |
| 2 1        | 5.0791E+00 | 5.0740E+00 | 5.0697E-03  | 9.9816E-02  | 1.0000E+00 | 7.3300E-03 | 4.7100E-03 |
| 0.0000E+00 |            |            |             |             |            |            |            |
| 3 1        | 5.1781E+00 | 5.1728E+00 | 5.3229E-03  | 1.0280E-01  | 1.0000E+00 | 1.0600E-02 | 4.5400E-03 |
| 0.0000E+00 |            |            |             |             |            |            |            |
| 4 1        | 5.2422E+00 | 5.2440E+00 | -1.8210E-03 | -3.4738E-02 | 1.0000E+00 | 1.3650E-02 | 4.3800E-03 |
| 0.0000E+00 |            |            |             |             |            |            |            |
| 5 1        | 5.2908E+00 | 5.2970E+00 | -6.2346E-03 | -1.1784E-01 | 1.0000E+00 | 1.6490E-02 | 4.2400E-03 |
| 0.0000E+00 |            |            |             |             |            |            |            |
| 6 1        | 5.4319E+00 | 5.4358E+00 | -3.8981E-03 | -7.1764E-02 | 1.0000E+00 | 2.8270E-02 | 3.6300E-03 |
| 0.0000E+00 |            |            |             |             |            |            |            |
| 7 1        | 5.4969E+00 | 5.4941E+00 | 2.7981E-03  | 5.0903E-02  | 1.0000E+00 | 3.7110E-02 | 3.1800E-03 |
| 0.0000E+00 |            |            |             |             |            |            |            |
| 8 1        | 5.5299E+00 | 5.5260E+00 | 3.9248E-03  | 7.0975E-02  | 1.0000E+00 | 4.3980E-02 | 2.8200E-03 |
| 0.0000E+00 |            |            |             |             |            |            |            |
| 9 1        | 5.5510E+00 | 5.5459E+00 | 5.1093E-03  | 9.2043E-02  | 1.0000E+00 | 4.9480E-02 | 2.5400E-03 |
| 0.0000E+00 |            |            |             |             |            |            |            |
| 10 1       | 5.5528E+00 | 5.5595E+00 | -6.7086E-03 | -1.2082E-01 | 1.0000E+00 | 5.3970E-02 | 2.3100E-03 |
| 0.0000E+00 |            |            |             |             |            |            |            |

TOLERANCE ON SUM OF SQUARES 0.0100

TOLERANCE ON EIGEN VALUES 0.0001

CONVERGANCE AFTER 5 ITERATIONS

Table S14 Data for Job's plot **3c** with TBABr

| Host ( $\mu\text{L}$ ) | Guest ( $\mu\text{L}$ ) | [H]/([H]+[G]) | $\delta$ (ppm) | $\Delta\delta$ [H]/([H]+[G]) |
|------------------------|-------------------------|---------------|----------------|------------------------------|
| 50                     | 450                     | 0.1           | 5.0004         | 0.0324                       |
| 100                    | 400                     | 0.2           | 4.9472         | 0.0537                       |
| 150                    | 350                     | 0.3           | 4.9161         | 0.0709                       |
| 200                    | 300                     | 0.4           | 4.8776         | 0.0786                       |
| 250                    | 250                     | 0.5           | 4.8437         | 0.0808                       |
| 300                    | 200                     | 0.6           | 4.7429         | 0.0355                       |
| 350                    | 150                     | 0.7           | 4.7731         | 0.0627                       |
| 450                    | 50                      | 0.9           | 4.7063         | 0.0199                       |
| 500                    | 0                       | 1             | 4.6843         | 0.0000                       |

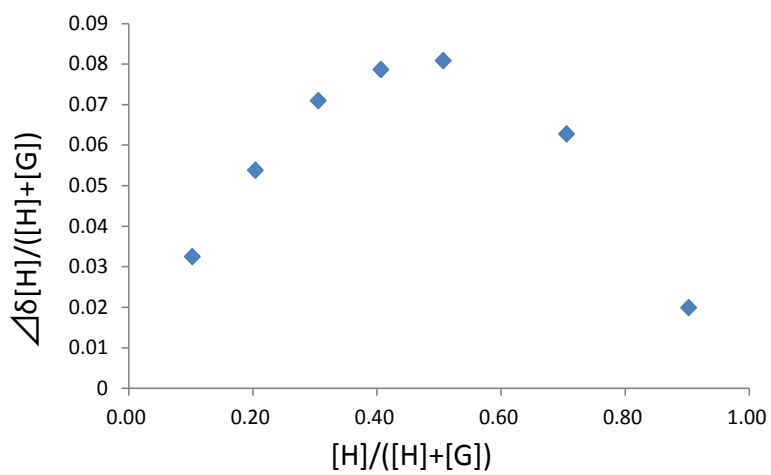

Figure S22 Job's plot of **3c** with TBABr

#### 4. ESI Mass Spectral Data

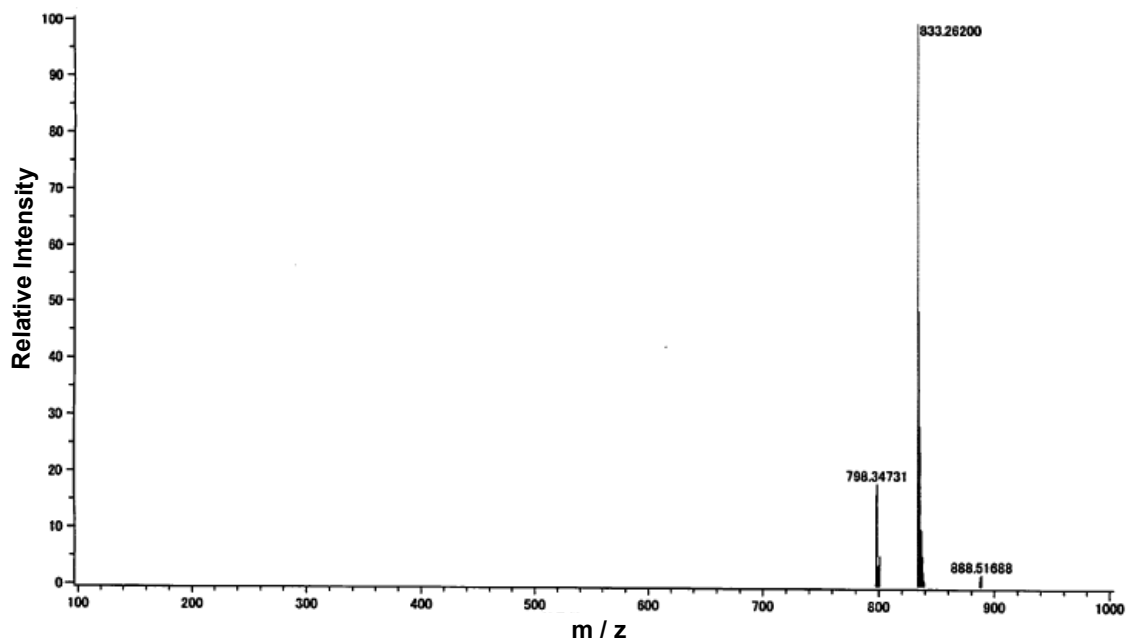

Figure S23 ESI-MS (negative ion mode) of **3c** · Cl<sup>-</sup>

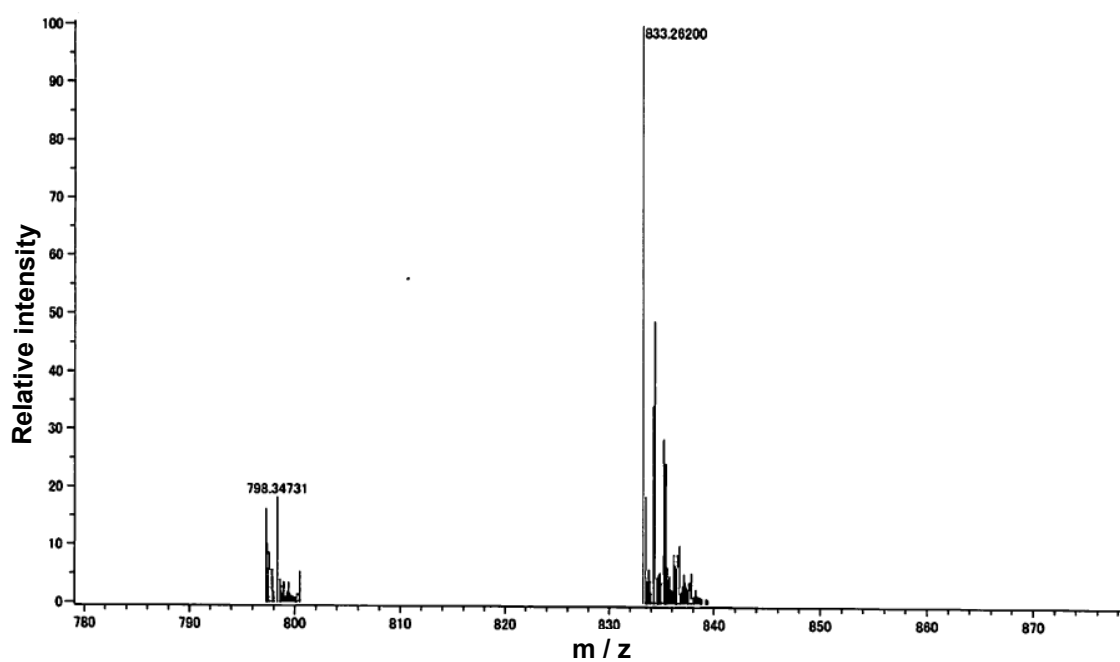

Figure S24 ESI-MS of  $3c \cdot Cl^-$  in Selected Range

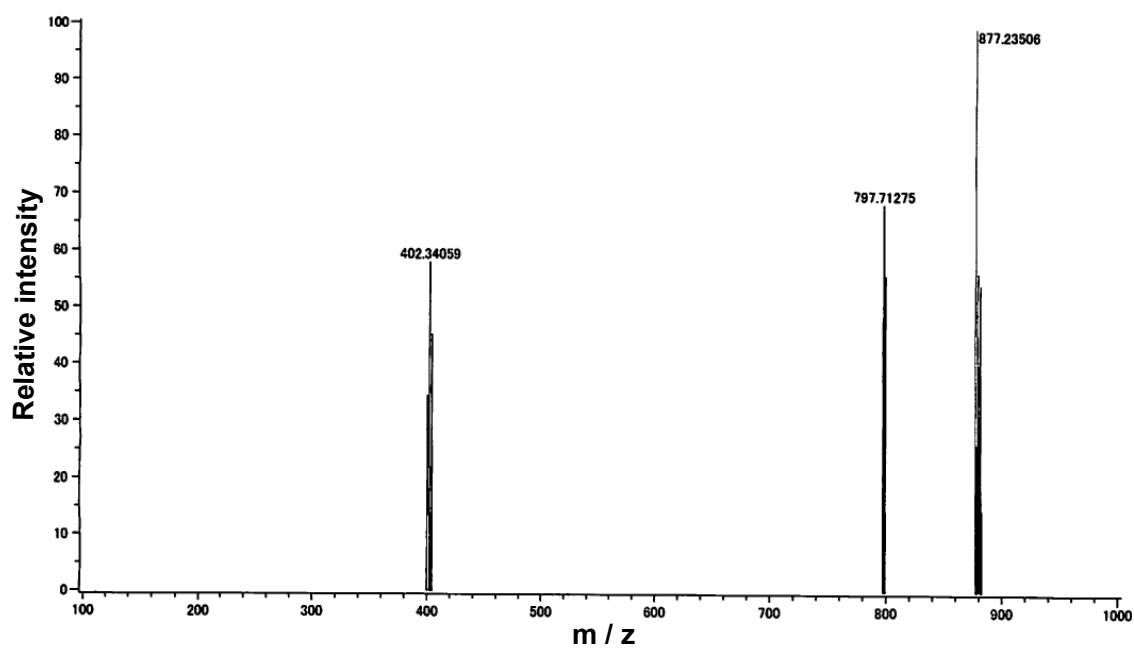

Figure S25 ESI-MS (negative ion mode) of  $3c \cdot Br^-$

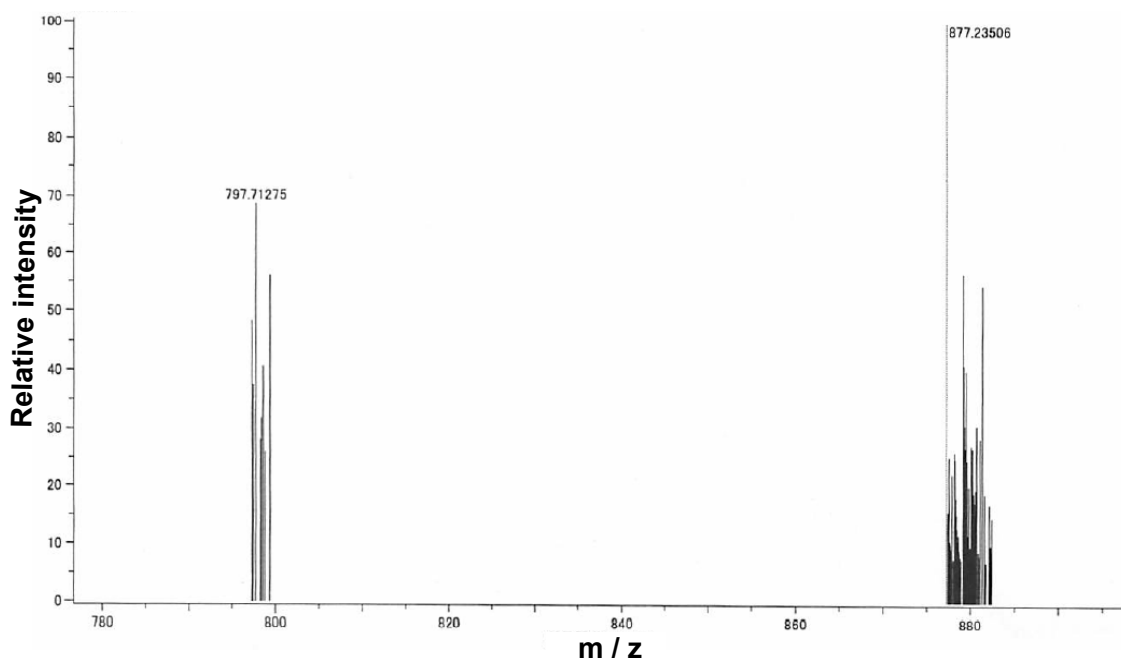

Figure S26 ESI-MS of  $3c \cdot Br$  in Selected Range

#### 5. Supporting References

- 1) Y. Kawakami, Y. Sakuma, T. Wakuda, T. Nakai, M. Sirasaka, Y. Kabe, *Organometallics* **2010**, *29*, 3281.
- 2) C. Walsdorff, W. Saak, S. Pohl, *J. Chem. Res. (M)*, **1996**, 1601.
- 3) M. Lee, S. Ko, S. Chang, *J. Am. Chem. Soc.*, **2000**, *122*, 12011.
- 4) H. Liu, S. Kondo, R. Tanaka, H. Oku, M. Unno, *J. Organomet. Chem.*, **2008**, *693*, 1301.
- 5) For details of numerical calculations being available in ESI: M. A. Saeed, F. R. Fronczek and M. A. Hossain, *Chem. Commun.*, **2009**, 6409.
- 6) M. J. Hynes, *J. Chem., Soc., Dalton Trans.*, **1993**, 311.
